# Supplementary material for: The initial deficiency of protein processing and flavonoids biosynthesis were the main mechanisms for the male sterility induced by SX-1 in Brassica napus
Source: BMC Genomics. 2018 Nov 7;19:806. doi: 10.1186/s12864-018-5203-y (PMC6223035; doi:10.1186/s12864-018-5203-y)
Supplement: Supplementary file 1 — The identification and relative expression level of DEPs. (XLSX 29 kb) [file 12864_2018_5203_MOESM1_ESM.xlsx]

## Sheet: Sheet1
Additional file 1. The identification and relative expression level of DEPs.
No.	Identified Protein	Arabidopsis homologue	Mr	Score	Relative expression level
					SA	CHA-SA	MA	CHA-MA	LA	CHA_LA	LA2	CHA_LA2
Amino Acid Metabolism
204	Protein Tapetum 1	AT3G42960	28556	112	216.482	0	278.583	0	179.809	0	17.0811	0
627	S-adenosylmethionine Synthetase	AT2G36880	19504	126	25.4885	0	0	0	72.5741	0	0	0
1101	Glutathione Transferase	AT2G30860	17343	119	39.7583	24.0641	29.7738	107.385	11.4252	20.5294	41.8661	47.4024
1306	Glutamine Synthetase	AT3G17820	39356	34	164.202	103.381	194.293	146.523	29.2883	11.2246	227.094	302.359
1526	Putative Protein	AT4G13430	55868	128	29.3561	3.85	45.0853	0	30.2299	0	19.4674	217.59
2418	S-Adenosylmethionine Synthase 3	AT2G36880	42927	375	402.174	134.12	476.359	174.45	341.875	230.121	138.378	328.677
3414	S-Adenosylmethionine Synthase 2	AT4G01850	43627	560	639.136	74.1739	389.576	161.175	28.5941	61.5073	94.3823	188.293
4215	Branched-Chain Alpha-Keto Acid Decarboxylase E1 Beta Subunit	AT1G55510	39294	101	374.405	82.8408	188.3	0	72.6498	56.7005	70.8102	92.8651
Biosynthesis of Other Secondary Metabolites
1502	Hydroxycinnamoyl-Coenzyme A Shikimate/Quinate Hydroxycinnamoyltransferase-Like	AT5G48930	47658	45	292.847	58.7752	186.251	366.15	224.104	191.313	9.74548	0
2415	hydroxymethylglutaryl-CoA synthase / HMG-CoA synthase	AT4G11820	51600	170	10.4557	60.0581	69.1991	0	86.2835	38.6384	70.3552	95.9
2502	Transferase Family Protein	AT2G19070	42434	433	65.7726	162.669	172.756	147.6	142.776	167.07	37.311	0
3211	alpha/beta-Hydrolases superfamily protein	AT3G51000	36850	83	348.051	112.997	1093.89	234.392	61.3229	61.6664	28.0228	241.781
3422	Reversibly Glycosylated Polypeptide 2	AT5G15650	41377	434	552.6	131.341	0	0	5.79492	92.811	279.216	1553.92
7112	Chalcone Synthase 2 Protein	AT4G00040	43246	433	48.25	9.44463	77.6376	93.7454	52.5454	37.6066	113.142	50.2984
8106	Caffeoyl-Coa O-Methyltransferase	AT1G67980	19595	82	33.4626	0	180.267	0	95.8835	0	97.1014	0
Carbohydrate Metabolism
215	Udp-D-Glucose/Udp-D-Galactose 4-Epimerase 2	AT4G23920	38739	473	411.634	59.9015	241.994	19.75	86.0994	47.3802	78.9319	19.8004
318	Galactose mutarotase-like superfamily protein	AT4G23730	34585	74	50.2731	106.087	61.3431	297.35	43.6682	33.5316	62.7338	91.475
1320	Lactate/malate dehydrogenase family protein	AT1G04410	35945	309	587.003	1130.16	740.8	1056.87	648.906	930.934	176.744	1443.98
3505	At3G03250/T17B22_6	AT3G03250	51847	149	383.724	0	0	0	217.514	106.561	79.6205	492.431
4713	Glycosyl hydrolase superfamily protein	AT1G75940	64278	52	45.5886	43.5011	325.1	337.6	48.3285	8.71327	39.9051	0
Cell Communication
8118	Thaumatin-Like Protein	AT1G75030	26267	107	204.987	41.5683	977.014	339.017	64.2608	309.184	223.902	67.0742
Cell division
6824	Cell Division Control Protein 48-A	AT3G09840	90293	39	1.5	0	8.4949	0	1.76163	5.33458	6.90515	0
Cytoskeleton proteins
7617	Beta-Tubulin	AT5G12250	50984	258	205.25	73.8724	94.9973	0	76.8933	54.7	30.1135	0
7619	Tubulin Beta-9 Chain	AT4G20890	50310	378	0	67.417	150.815	92.5	118.442	269.653	91.0372	123.492
6407	Actin-12	AT3G46520	41996	381	0	0	0	0	323.939	98.1074	805.088	0
7614	Tubulin Beta-2 Chain	AT5G62690	51222	358	97.5234	7.32674	122.028	154.45	87.5658	0	13.8617	0
7603	Nucleotide-Binding Subunit of Vacuolar Atpase	AT1G76030	54819	656	123.752	49.3419	159.184	129.186	821.816	146.649	118.564	172.604
6418	Actin	AT3G12110	41945	571	101.676	105.615	575.367	554.315	1095.81	307.597	1282.38	537.968
Defense
104	Putative Manganese Superoxide Dismutase 1	AT3G10920	24599	74	34.7227	0	39.1777	0	197.829	0	84.2531	0
1217	Nmra-Like Negative Transcriptional Regulator Family Protein	AT4G39230	34222	229	43.2118	0	28.7194	290.002	41.5042	38.2491	76.4039	70.9697
1011	CBS Domain-Containing Protein	AT5G10860	22829	199	61.3839	205.817	1082.62	634.419	0	0	29.8658	25.8808
4103	Ribulose Bisphosphate Carboxylase Large Chain	AT1G26820	26017	66	282.405	28	189.901	38.9657	86.0357	18.4831	17.4543	17.4543
6208	Type-II NADH dehydrogenase	AT5G22140	37694	61	90.2549	4.21479	73.9392	14.0725	73.8931	65.0869	21.9736	21.9736
7209	At5G66570/K1F13_25	AT5G66570	35335	637	297.07	866.446	316.515	24.4819	167.571	107.635	175.811	175.811
8210	Strong Similarity To GF14 mu	AT1G26480	32891	294	0	96.8396	49.7	45.375	7.66225	28.35	109.232	109.232
Energy Metabolism
1214	Malate Dehydrogenase, Mitochondrial; Flags: Precursor	AT1G53240	35860	329	48.9706	30.9511	24.0666	139.595	332.474	175.26	382.285	169.024
2518	Putative Epoxide Hydrolase	ArthCp030	52574	561	0	171.342	162.232	347.71	55.8539	42.2	0	167.549
2605	Ribulose-1,5-biphosphate Carboxylase	ArthCp030	50085	465	1111.53	670.692	889.817	563.88	788.086	359.639	414.967	726.688
2614	Ribulose-1,5-Bisphosphate Carboxylase/Oxygenase Large Subunit, Partial (Chloroplast)	ArthCp030	51189	621	335.341	376.535	90.9434	1026.01	121.301	66.8552	252.034	257.086
3807	Cytoplasmic Aconitate Hydratase	AT2G05710	98720	742	24.9119	74.9825	74.67	135.209	293.609	99.7387	10.4625	71.0472
3813	Hypothetical Protein Aralydraft_480186	AT2G05710	100000	514	11.2363	10.9431	24.0804	0	10.1925	7.27835	22.8698	93.2933
5106	Soluble Inorganic Pyrophosphatase	AT1G01050	24894	118	59.0055	128.45	9.25	152.217	27.3141	21.9007	45.3351	177.536
5619	Aldehyde Dehydrogenase Family 7 Member A1	AT1G54100	53224	360	90.9393	247.15	42.3	193.821	22.7737	2.17332	30.15	0
5702	Transketolase-Like Protein	AT3G60750	81937	82	38.6418	112.195	235.453	84.1032	82.4366	40.6524	21.9978	54.4081
6116	PSI type III chlorophyll a/b-binding protein	AT1G61520	29085	283	92.5	13.95	133.889	409.056	50.3413	81.4478	50.487	89.7802
6221	Photosystem Ii Subunit O-2	AT3G50820	35323	523	255.728	346.422	546.464	0	65.3408	87.4435	19.85	0
6610	ATP Synthase Cf1 Alpha Subunit	ArthCp007	55351	620	239.295	360.4	11.682	39.8667	45.9296	0	22.0558	21.5401
7104	Chlorophyll A/B Binding Protein	AT1G29930	29142	333	203.362	145.055	121.397	56.355	229.137	150.67	45.0079	9.85467
7504	Monodehydroascorbate Reductase (Nadh)-Like Protein	AT5G03630	47829	202	91.3409	11.4369	53.0038	0	54.6646	150.058	71.9564	26.4685
8211	Plastid-Lipid Associated Protein Pap1	AT4G04020	35714	637	37.3063	245.444	185.95	144.914	62.6922	89.05	45.2176	129.857
Lipid Metabolism
1531	3-Ketoacyl-Acyl Carrier Protein Synthase I	AT5G46290	50890	128	20.5997	54.5523	56.3766	29.9	124.322	60.7971	166.236	165.371
Metabolism of Terpenoids and Polyketides
2422	Chalcone Synthase 3 Protein	AT1G02050	43493	412	926.519	158.265	309.693	107.15	318.741	0	128.469	496.609
2417	Chalcone Synthase 3 Protein	AT1G02050	43493	461	121.686	0	469.17	212.667	486.2	223.85	0	0
1413	Chalcone Synthase 3 Protein	AT1G02050	43493	418	230.968	149.452	149.295	124.4	27.4115	0	16.9452	0.982061
Protein metabolism
2314	Protein Disulfide-isomerase A6	AT2G47470	39815	214	340.653	81.5916	335.686	179.887	72.983	62.2818	182.772	299.7
2319	Protein Disulfide-Isomerase A6	AT2G47470	39815	92	91.8661	368.494	163.35	54.2835	73.1317	138.396	167.018	0
2703	F23N19.10	AT1G62740	67625	54	62.9592	165.811	95.0511	80.0892	29.6257	12.2361	7.87831	0
2719	Putative Stress-Inducible Protein	AT1G12270	64829	55	55.9494	268.925	103.178	36.0489	23.5449	4.63369	8.29464	22.2502
3710	Hypothetical Protein Vitisv_000290	AT5G26360	61064	127	45.5076	105.853	798.54	99.5012	35.5595	17.2571	22.115	33.1276
3903	Hypothetical Protein Aralydraft_493210	AT4G16660	98695	300	86.7507	44.4316	148.885	194.55	81.2975	25.002	93.1641	0
4203	Thiol Protease Isoform B, Partial	AT4G39090	35687	53	6.85	0	57.4172	0	68.1539	0	139.9	191.3
4812	Apg6/Clpb-P/Clpb3	AT5G15450	100000	137	3.78726	0	0	0	12.8183	2.77208	19.6405	0
5120	Serine Carboxypeptidase-Like	AT3G10410	31779	62	186.8	146.277	9.25	152.217	58.0517	50.6405	54.5843	8.9529
5604	Carboxypeptidase	AT3G45010	57417	205	202.185	186.82	723.692	225.39	195.527	15.3494	35.5486	74.2873
5821	Putative Aminopeptidase	AT1G63770	99845	337	70.347	33.7473	18.7215	28.3501	17.5845	20.8539	45.3814	19.061
6315	Hypothetical Protein Aralydraft_485224	AT3G48690	35697	126	115.992	100.597	125.43	276.757	172.691	52.6635	45.8795	67.2809
6710	Heat Shock Protein 70 Cognate	AT5G02500	71726	334	20.7331	0	206.15	0	16.0217	6.98482	29.3812	0
6819	Hypothetical Protein Aralydraft_493781	AT5G42020	73825	549	437.598	182.866	931.732	404.767	23.8787	297.119	177.753	151.37
6823	Luminal Binding Protein	AT5G42020	73831	543	1354.73	498.983	416.806	1868.86	444.953	517.869	565.898	0
6827	Transitional Endoplasmic Reticulum Atpase	AT5G03340	94357	282	225.463	72.1775	388.47	76.3347	64.9484	22.8648	26.5168	73.0307
6901	Putative Heat-Shock Protein; 41956-44878	AT1G79920	82522	79	57.9901	26.5416	89.0061	55.5221	24.2749	3.37458	65.2473	33.0717
6903	Heat Shock Protein 70	AT1G79920	90688	49	19.884	26.7524	51.5931	51.95	32.9659	20.5167	21.3854	28.4737
6915	Transitional Endoplasmic Reticulum Atpase	AT5G03340	94357	233	72.4612	11.8534	85.1017	67.9	14.3326	11.5626	9.47705	25.2149
7618	CHAP70-Interacting Protein 1	AT4G22670	46648	88	31.253	0	17.05	0	8.15809	45.6071	0	0
7801	CHAP90-like protein GRP94	AT4G24190	94203	466	278.175	13.5019	1185.03	534.028	176.794	162.046	114.819	39.5758
7825	Heat Shock Protein 81-4	AT5G56000	70814	379	465.931	445.654	208.219	10.4	41.039	12.5861	89.4014	16.3099
8234	Cysteine Protease	AT5G60360	39934	39	0	171.47	0	448.267	0	309.415	76.102	73.5834
8802	Protein Disulfide Isomerase Precursor-Like	AT5G60640	66584	128	67.1604	7.27011	271.75	0	9.86509	0	10.145	65.95
8806	Protein Disulfide Isomerase Precursor-Like	AT5G60640	66584	116	293.4	3.59645	0	0	8.40344	0	27.1766	0
8810	Hypothetical Protein Aralydraft_496212	AT5G60640	65193	33	136.774	26.1688	164.682	36.3742	27.7086	9.78252	0	0
8811	Chloroplast Heat Shock Protein 70-1	AT5G49910	74484	164	0	0	14.9923	0	6.40971	6.56836	6.22923	0
8819	Protein Disulfide Isomerase Precursor-Like	AT5G60640	66584	107	47.1407	15.7629	222.789	50.9805	6.6273	8.38279	0	0
8825	Protein Disulfide-Isomerase A1	AT5G60640	66356	32	27.3945	0	67.7023	0	0	0	0	0
9409	Daikon Cysteine Protease Rd21	AT5G43060	32085	326	0	506.506	0	62.4007	38.6623	1127.59	230.266	218.399
Replication and Repair
2306	Histone H4	AT2G28740	11402	31	47.7262	93.2009	65.1426	0	31.8814	311.797	0	0
Signal Transduction
3712	Auxin Reponsive-Like Protein	AT5G13370	65180	68	185.263	50.1211	798.54	99.5012	16.9093	41.3377	2.83686	27.8786
8208	1433-1	AT1G22300	28853	200	87.4548	291.658	71.6905	38.8654	189.809	79.2141	98.239	58.7428
Translation
329	Eukaryotic Translation Initiation Factor 3 Subunit 2	AT2G46290	36351	81	346.784	65.8889	281.671	0	143.915	34.7108	119.557	44.6554
5002	Translation Initiation Factor-5A	AT1G26630	17315	133	114.381	71.1953	65.6458	479.2	0	0	38.2834	84.4465
3119	Ribonuclease 3	AT1G26820	26017	106	0	155.118	0	132.415	46.3416	20.949	55.8423	10.0683
2217	Hypothetical Protein	AT1G56070	40589	279	112.612	16.7006	106.662	173.429	19.2313	6.41283	51.7127	9.79121
Transport and Catabolism
5315	Annexin 1	AT1G35720	36307	90	0	486.7	0	216.358	242.938	52.2667	78.388	78.388
8304	Kelch Repeat-Containing F-Box Family Protein	AT1G15670	40150	34	0	0	0	14.2682	64.6344	19.6676	6.17639	6.17639
105	Gtp-Binding Nuclear Protein Ran/Tc4	AT5G55190	25616	241	133.4	196.459	314.3	169.279	169.108	351.941	197.491	197.491
5318	Annexin 1	AT1G35720	36307	576	70.8132	8.75	186.621	113.629	175.892	52.5614	21.9345	21.9345
unclassified
909	Purple Acid Phosphatase 6	AT1G56360	63450	99	41.8843	25.5561	20.761	0	14.4246	94.7115	10.4789	17.113
6621	Selenium-Binding Protein 2	AT4G14040	50259	36	594.963	76.6763	249.42	177.42	23.0375	16.651	98.1554	217.25
6811	Uncharacterized Protein	AT4G27620	36105	36	25.4772	0	16.236	0	4.87522	0	0.31798	0
7211	Uncharacterized Protein	AT5G08540	38745	171	58.6691	18.5304	366.684	0	97.6098	2.68597	31.4359	77.9054
7302	Uncharacterized Protein	AT5G08540	38745	241	193.675	29.4307	156.857	0	291.076	26.935	263.549	118.565
9404	Predicted Protein	AT5G39570	43938	92	11.3	7.8	79.5985	262.076	9.85207	0	8	0
0 represent undetectable valuable
