# Supplementary material for: The initial deficiency of protein processing and flavonoids biosynthesis were the main mechanisms for the male sterility induced by SX-1 in Brassica napus
Source: BMC Genomics. 2018 Nov 7;19:806. doi: 10.1186/s12864-018-5203-y (PMC6223035; doi:10.1186/s12864-018-5203-y)
Supplement: Supplementary file 2 — Summary of output and mapping of the clean reads from the different samples. (XLSX 11 kb) [file 12864_2018_5203_MOESM2_ESM.xlsx]

## Sheet: Sheet1
Additional file 2. Summary of output and mapping of the clean reads from the different samples.
Samples	RNA-seq					miRNA-seq
	Raw_pairs	Clean pairs	Multiple_mapping pairs	Unique_mapping pairs	Total_mapping reads%	Raw data	clean data
YB-1	48844630	33422087	1213037	24937299	0.842	35224410	23134949
YB-2	48112643	41354060	5810062	26709249	0.88	44548956	29550948
YB-3	42713986	37330696	5171950	24049573	0.876	46103509	30570842
SA-1	46068000	32006611	1241149	23648235	0.837	21118300	10533624
SA-2	32231065	25501528	1028096	18892340	0.85	28544078	15575053
SA-3	28972173	23314092	917339	17195863	0.845	29667054	16166593
MA-1	43767098	29232102	1290949	21488454	0.84	26403537	21015451
MA-2	56296406	47338398	7140546	29953331	0.876	35154720	21200071
MA-3	51021052	43680601	6503609	27580643	0.872	36311626	21958862
LA-1	51839220	34718904	1843010	25416192	0.843	28778247	20147980
LA-2	33085714	25075664	1398297	18133159	0.854	41932347	31153492
LA-3	29751557	22984075	1256513	16551112	0.85	43655386	32476750
CHA_YB-1	46370622	31454745	1146446	23470224	0.842	27507579	20204438
CHA_YB-2	77936000	65267545	9063050	42320289	0.877	28868991	21608069
CHA_YB-3	69886969	59604531	8157926	38549751	0.873	29936435	22424428
CHA_SA-1	44092696	29957302	1150837	22169168	0.841	16697943	7428318
CHA_SA-2	50278000	41808002	4515485	28018266	0.87	27328953	18463415
CHA_SA-3	53231681	45255507	4819307	30225908	0.867	28098196	18853779
CHA_MA-1	41347794	28057676	1170452	20656290	0.845	29848928	15214520
CHA_MA-2	103672354	87644739	4679181	62983894	0.852	21432416	14243773
CHA_MA-3	106583825	91531682	4797806	65500569	0.848	22443616	14917710
CHA_LA-1	45739000	30577905	1169932	22665591	0.84	19067536	8104914
CHA_LA-2	55463996	47387276	2230915	34831966	0.861	6892941	3548866
CHA_LA-3	48235224	41205551	1917217	30313633	0.861	25927096	13318989
