# Supplementary material for: The initial deficiency of protein processing and flavonoids biosynthesis were the main mechanisms for the male sterility induced by SX-1 in Brassica napus
Source: BMC Genomics. 2018 Nov 7;19:806. doi: 10.1186/s12864-018-5203-y (PMC6223035; doi:10.1186/s12864-018-5203-y)
Supplement: Supplementary file 3 — The Log 2 ratio (CHA/control) of some selected DEGs in B. napus. (XLSX 11 kb) [file 12864_2018_5203_MOESM3_ESM.xlsx]

## Sheet: Sheet1
Additional file 3. The Log 2 ratio (CHA/control) of some selected DEGs in B. napus.
	YB	SA	MA	LA
CSR1	-2.59	-0.54	0.57	0
CSR1	-2.07	-0.31	0.46	0
AG	-0.2	0.79	0.34	1.79
AG	-0.04	0.97	1.08	3.76
NZZ/SPL	0.12	-0.01	-0.07	-2.84
NZZ/SPL	0.25	-0.03	-0.09	-2.35
MPA24.5/BAM1	0	-0.21	-0.33	3.28
MPA24.5/BAM1	-0.1	-0.36	-0.29	2.24
BAM2	0.01	-0.02	0.09	0.38
EMS1	-0.1	-0.46	0.03	1.65
DYT1	-0.02	0	2.24	3.07
DYT1	-0.27	0	2.83	2.15
AMS	0.52	-0.23	0.18	3.06
AMS	0.53	-0.59	0.31	1.16
MPK3	-0.78	0.58	0.11	2.91
MPK3	-1.08	0.55	0.4	2.28
ERL2	-0.11	0.32	-0.28	2.38
ERL2	-0.08	0.27	0.21	-0.18
PPR	0	-3.23	0	0
PPR	0.3	-1.2	-0.28	-1.19
PPR	0.76	-2.28	0.29	0.39
PPR	0.9	-1.59	0.17	-0.06
ABCG9	-2.74	0.15	-0.39	2.7
ABCG9	-1.86	-0.36	-0.55	2.19
ABCG31	0.49	0.67	-0.33	-1.49
ABCG31	-0.14	-0.26	-0.11	-2.42
CYP703A2	-3.95	-0.94	-0.17	-0.24
CYP703A2	-4.34	-0.55	0.34	0.38
ACOS5	0.63	-1.16	0.06	-0.36
ACOS5	0.29	-1.75	0.07	-0.54
KCS3	0.00541293	1.03862	-1.29698	3.24156
KCS2	-0.112305	0.95104	-0.998844	-1.00459
LTP12	-5.68	1.1	0.35	2.46
LTP12	-4.16	-0.69	-0.83	0
LACS5	0	1.43822	0.872153	-2.96529
LACS5	-0.115133	1.69591	1.06395	-3.41988
LACS6	0.189924	-0.289186	0.16531	-2.06355
LACS6	0.04	0.02	-0.05	-1.5
LAP6	-2.06	-0.88	0.03	-0.51
LAP6	-2.71	-1.37	-0.97	-0.68
CCOAMT	-8.05	1.5	-0.8	2.48
SAM	-1.23	1.05	-0.07	-1.22
TT4	-1.58	1.25	0.17	-0.95
TT4	-2.05	1.18	-0.13	1.19
ATA1	-1.66	-0.11	0.1	-0.32
MAT3	0.41	-0.53	0.38	-1.91
MAT3	0.43	0.56	1.13	-2.77
MS2	0.21	0.31	-0.51	-4.09
MS2	0.14	0.49	-0.2	-3.53
GLN1.3	0.05	0.14	-0.23	-1.85
GLN1.3	-3.04	0.13	0.27	-2.06
