# Supplementary material for: The initial deficiency of protein processing and flavonoids biosynthesis were the main mechanisms for the male sterility induced by SX-1 in Brassica napus
Source: BMC Genomics. 2018 Nov 7;19:806. doi: 10.1186/s12864-018-5203-y (PMC6223035; doi:10.1186/s12864-018-5203-y)
Supplement: Supplementary file 4 — The differentially expressed TFs at YB stage. (XLSX 26 kb) [file 12864_2018_5203_MOESM4_ESM.xlsx]

## Sheet: sheet1
Additional file 4.The differentially expressed TFs at YB stage.
GeneID	Log 2 ratio (CHA/CK)	p_value	q_value	type	Ath_ID	Annotation
BnaC06g28050D	2.29778	5e-05	0.000893723	Up	AT1G69580.2	Arabidopsis thaliana|G2-like|G2-like family protein
BnaC06g27940D	2.11466	5e-05	0.000893723	Up	AT1G69690.1	Arabidopsis thaliana|TCP|TCP family protein
BnaCnng17820D	2.11445	0.00045	0.00642596	Up	AT1G56650.1	Arabidopsis thaliana|MYB|production of anthocyanin pigment 1
BnaAnng32610D	1.97321	5e-05	0.000893723	Up	AT4G31800.2	Arabidopsis thaliana|WRKY|WRKY DNA-binding protein 18
BnaC06g36190D	1.8785	5e-05	0.000893723	Up	AT1G75430.1	Arabidopsis thaliana|TALE|BEL1-like homeodomain 11
BnaC06g29350D	1.95803	5e-05	0.000893723	Up	AT1G68200.2	Arabidopsis thaliana|C3H|C3H family protein
BnaC06g35510D	1.73986	0.0001	0.00168735	Up	AT1G74650.1	Arabidopsis thaliana|MYB|myb domain protein 31
BnaC06g27780D	1.87799	5e-05	0.000893723	Up	AT1G66810.1	Arabidopsis thaliana|C3H|C3H family protein
BnaC06g36180D	1.39229	5e-05	0.000893723	Up	AT1G75410.2	Arabidopsis thaliana|TALE|BEL1-like homeodomain 3
BnaC01g43150D	1.54487	0.0002	0.00314867	Up	AT1G60300.1	Arabidopsis thaliana|NAC|NAC family protein
BnaA09g19790D	1.63664	5e-05	0.000893723	Up	AT1G60380.1	Arabidopsis thaliana|NAC|NAC family protein
BnaA09g19800D	1.56957	0.0006	0.00828799	Up	AT1G60240.1	Arabidopsis thaliana|NAC|NAC family protein
BnaC05g16580D	1.46156	5e-05	0.000893723	Up	AT1G21340.1	Arabidopsis thaliana|Dof|Dof family protein
BnaCnng75540D	1.51998	5e-05	0.000893723	Up	AT1G56650.1	Arabidopsis thaliana|MYB|production of anthocyanin pigment 1
BnaC06g37060D	1.54295	5e-05	0.000893723	Up	AT1G76320.1	Arabidopsis thaliana|FAR1|FAR1-related sequence 4
BnaC06g37170D	1.35589	0.00035	0.00515454	Up	AT1G76420.1	Arabidopsis thaliana|NAC|NAC family protein
BnaC06g29980D	1.5018	5e-05	0.000893723	Up	AT1G69120.1	Arabidopsis thaliana|MIKC_MADS|MIKC_MADS family protein
BnaC06g27170D	1.49266	5e-05	0.000893723	Up	AT5G37020.1	Arabidopsis thaliana|ARF|auxin response factor 8
BnaC06g38430D	1.32518	5e-05	0.000893723	Up	AT1G77920.1	Arabidopsis thaliana|bZIP|bZIP family protein
BnaC06g37640D	1.44303	5e-05	0.000893723	Up	AT1G76880.1	Arabidopsis thaliana|Trihelix|Trihelix family protein
BnaC06g33250D	1.39253	5e-05	0.000893723	Up	AT1G72210.1	Arabidopsis thaliana|bHLH|bHLH family protein
BnaCnng32040D	1.38271	5e-05	0.000893723	Up	AT1G60280.1	Arabidopsis thaliana|NAC|NAC domain containing protein 23
BnaCnng61400D	1.34648	5e-05	0.000893723	Up	AT1G69170.1	Arabidopsis thaliana|SBP|SBP family protein
BnaC01g43190D	1.37095	5e-05	0.000893723	Up	AT1G60300.1	Arabidopsis thaliana|NAC|NAC family protein
BnaC09g47120D	1.3362	5e-05	0.000893723	Up	AT5G09410.2	Arabidopsis thaliana|CAMTA|ethylene induced calmodulin binding protein
BnaC06g36000D	1.40402	5e-05	0.000893723	Up	AT1G75240.1	Arabidopsis thaliana|ZF-HD|homeobox protein 33
BnaA07g07850D	1.35932	5e-05	0.000893723	Up	AT3G12680.1	Arabidopsis thaliana|C3H|floral homeotic protein (HUA1)
BnaC06g26570D	1.16324	0.0002	0.00314867	Up	AT1G67710.1	Arabidopsis thaliana|ARR-B|response regulator 11
BnaC06g33980D	1.34742	5e-05	0.000893723	Up	AT1G72830.1	Arabidopsis thaliana|NF-YA|nuclear factor Y, subunit A3
BnaC06g37430D	1.34465	5e-05	0.000893723	Up	AT1G76580.1	Arabidopsis thaliana|SBP|SBP family protein
BnaC06g30310D	1.35469	5e-05	0.000893723	Up	AT1G68640.1	Arabidopsis thaliana|bZIP|bZIP family protein
BnaC06g30790D	1.33858	5e-05	0.000893723	Up	AT1G69560.1	Arabidopsis thaliana|MYB|myb domain protein 105
BnaC06g36110D	1.31212	5e-05	0.000893723	Up	AT1G75340.2	Arabidopsis thaliana|C3H|C3H family protein
BnaC06g34320D	1.27985	5e-05	0.000893723	Up	AT1G73360.1	Arabidopsis thaliana|HD-ZIP|homeodomain GLABROUS 11
BnaC04g21960D	1.24161	5e-05	0.000893723	Up	AT3G61120.1	Arabidopsis thaliana|MIKC_MADS|AGAMOUS-like 13
BnaCnng78680D	1.25638	5e-05	0.000893723	Up	AT1G74840.1	Arabidopsis thaliana|MYB_related|MYB_related family protein
BnaC06g33880D	1.25237	5e-05	0.000893723	Up	AT1G72740.2	Arabidopsis thaliana|MYB_related|MYB_related family protein
BnaC06g28390D	1.15712	5e-05	0.000893723	Up	AT1G67310.1	Arabidopsis thaliana|CAMTA|Calmodulin-binding transcription activator protein with CG-1 and Ankyrin domains
BnaC04g05680D	1.2285	5e-05	0.000893723	Up	AT4G03170.1	Arabidopsis thaliana|B3|B3 family protein
BnaC06g26850D	1.20763	5e-05	0.000893723	Up	AT1G67310.1	Arabidopsis thaliana|CAMTA|Calmodulin-binding transcription activator protein with CG-1 and Ankyrin domains
BnaA03g34610D	1.16167	0.00045	0.00642596	Up	AT3G17609.2	Arabidopsis thaliana|bZIP|HY5-homolog
BnaA05g05790D	1.22683	5e-05	0.000893723	Up	AT4G03170.1	Arabidopsis thaliana|B3|B3 family protein
BnaA08g19170D	1.18137	5e-05	0.000893723	Up	AT1G24590.1	Arabidopsis thaliana|ERF|DORNROSCHEN-like
BnaC09g32530D	1.18584	5e-05	0.000893723	Up	AT1G60280.1	Arabidopsis thaliana|NAC|NAC domain containing protein 23
BnaC03g06970D	1.20761	5e-05	0.000893723	Up	AT5G15480.1	Arabidopsis thaliana|C2H2|C2H2 family protein
BnaA09g35990D	1.17862	5e-05	0.000893723	Up	AT3G56520.1	Arabidopsis thaliana|NAC|NAC family protein
BnaC09g14760D	1.17213	5e-05	0.000893723	Up	AT1G09770.1	Arabidopsis thaliana|MYB|cell division cycle 5
BnaC06g29910D	1.16108	5e-05	0.000893723	Up	AT1G69010.1	Arabidopsis thaliana|bHLH|BES1-interacting Myc-like protein 2
BnaA10g10080D	1.15475	0.0001	0.00168735	Up	AT1G60340.1	Arabidopsis thaliana|NAC|NAC family protein
BnaC06g30140D	1.15415	5e-05	0.000893723	Up	AT1G68550.1	Arabidopsis thaliana|ERF|ERF family protein
BnaC06g33040D	1.10437	5e-05	0.000893723	Up	AT1G72010.1	Arabidopsis thaliana|TCP|TCP family protein
BnaC06g37080D	1.09545	5e-05	0.000893723	Up	AT1G76350.1	Arabidopsis thaliana|Nin-like|Nin-like family protein
BnaC07g09800D	1.08846	5e-05	0.000893723	Up	AT3G12680.1	Arabidopsis thaliana|C3H|floral homeotic protein (HUA1)
BnaA03g05440D	1.11911	5e-05	0.000893723	Up	AT5G15480.1	Arabidopsis thaliana|C2H2|C2H2 family protein
BnaC06g34570D	1.07333	5e-05	0.000893723	Up	AT1G73730.1	Arabidopsis thaliana|EIL|ETHYLENE-INSENSITIVE3-like 3
BnaC08g27480D	1.1012	5e-05	0.000893723	Up	AT3G56520.1	Arabidopsis thaliana|NAC|NAC family protein
BnaC06g33800D	1.0868	5e-05	0.000893723	Up	AT1G72650.1	Arabidopsis thaliana|MYB_related|TRF-like 6
BnaC06g36370D	1.07632	5e-05	0.000893723	Up	AT1G75710.1	Arabidopsis thaliana|C2H2|C2H2-like zinc finger protein
BnaC06g30320D	1.00518	0.00015	0.00243532	Up	AT1G68670.1	Arabidopsis thaliana|G2-like|G2-like family protein
BnaC01g12000D	1.01553	5e-05	0.000893723	Up	AT3G18100.3	Arabidopsis thaliana|MYB|myb domain protein 4r1
BnaA10g10100D	1.06169	5e-05	0.000893723	Up	AT1G60280.1	Arabidopsis thaliana|NAC|NAC domain containing protein 23
BnaC06g32180D	0.998301	0.0001	0.00168735	Up	AT1G71030.1	Arabidopsis thaliana|MYB_related|MYB-like 2
BnaC06g28000D	1.03722	5e-05	0.000893723	Up	AT1G69600.1	Arabidopsis thaliana|ZF-HD|zinc finger homeodomain 1
BnaC07g09810D	1.01626	5e-05	0.000893723	Up	AT5G16540.3	Arabidopsis thaliana|C3H|zinc finger nuclease 3
BnaC01g28650D	1.00148	5e-05	0.000893723	Up	AT1G60240.1	Arabidopsis thaliana|NAC|NAC family protein
BnaA08g21040D	0.992923	5e-05	0.000893723	Up	AT4G23980.2	Arabidopsis thaliana|ARF|auxin response factor 9
BnaCnng65580D	0.993473	5e-05	0.000893723	Up	AT1G29600.1	Arabidopsis thaliana|C3H|C3H family protein
BnaC02g39580D	0.993944	5e-05	0.000893723	Up	AT1G48150.1	Arabidopsis thaliana|M-type_MADS|M-type_MADS family protein
BnaC09g09210D	-0.978433	5e-05	0.000893723	Down	AT2G17040.1	Arabidopsis thaliana|NAC|NAC domain containing protein 36
BnaC03g73070D	-0.972234	5e-05	0.000893723	Down	AT5G62020.1	Arabidopsis thaliana|HSF|heat shock transcription factor B2A
BnaA07g33930D	-0.998468	5e-05	0.000893723	Down	AT1G78080.1	Arabidopsis thaliana|ERF|related to AP2 4
BnaC03g69420D	-0.996154	5e-05	0.000893723	Down	AT3G15210.1	Arabidopsis thaliana|ERF|ethylene responsive element binding factor 4
BnaC06g40040D	-0.952465	0.00065	0.00886637	Down	AT1G79700.1	Arabidopsis thaliana|AP2|AP2 family protein
BnaA03g01420D	-1.00479	5e-05	0.000893723	Down	AT5G04760.1	Arabidopsis thaliana|MYB|MYB family protein
BnaA02g01960D	-1.01546	5e-05	0.000893723	Down	AT5G14010.1	Arabidopsis thaliana|C2H2|C2H2 family protein
BnaA04g22040D	-0.950788	0.00015	0.00243532	Down	AT2G38470.1	Arabidopsis thaliana|WRKY|WRKY DNA-binding protein 33
BnaA03g33790D	-1.02722	5e-05	0.000893723	Down	AT3G15210.1	Arabidopsis thaliana|ERF|ethylene responsive element binding factor 4
BnaA07g31550D	-1.02922	5e-05	0.000893723	Down	AT1G74430.1	Arabidopsis thaliana|MYB|myb domain protein 95
BnaCnng10130D	-1.01585	5e-05	0.000893723	Down	AT1G61110.1	Arabidopsis thaliana|NAC|NAC domain containing protein 25
BnaA03g02640D	-1.00323	5e-05	0.000893723	Down	AT5G08790.1	Arabidopsis thaliana|NAC|NAC family protein
BnaA06g10760D	-1.04596	5e-05	0.000893723	Down	AT1G16060.2	Arabidopsis thaliana|AP2|ARIA-interacting double AP2 domain protein
BnaCnng02000D	-1.01654	5e-05	0.000893723	Down	AT4G01250.1	Arabidopsis thaliana|WRKY|WRKY family protein
BnaC03g01730D	-1.03799	5e-05	0.000893723	Down	AT5G04760.1	Arabidopsis thaliana|MYB|MYB family protein
BnaC03g52400D	-1.05486	5e-05	0.000893723	Down	AT3G49530.1	Arabidopsis thaliana|NAC|NAC domain containing protein 62
BnaA01g19870D	-1.05885	5e-05	0.000893723	Down	AT3G46600.3	Arabidopsis thaliana|GRAS|GRAS family protein
BnaAnng28960D	-1.07255	5e-05	0.000893723	Down	AT1G21910.1	Arabidopsis thaliana|ERF|ERF family protein
BnaAnng23990D	-1.04527	5e-05	0.000893723	Down	AT1G80840.1	Arabidopsis thaliana|WRKY|WRKY DNA-binding protein 40
BnaA07g28170D	-1.08278	5e-05	0.000893723	Down	AT1G69600.1	Arabidopsis thaliana|ZF-HD|zinc finger homeodomain 1
BnaC02g16640D	-1.0841	5e-05	0.000893723	Down	AT5G67300.1	Arabidopsis thaliana|MYB|myb domain protein r1
BnaC01g01660D	-1.10005	5e-05	0.000893723	Down	AT4G37260.1	Arabidopsis thaliana|MYB|myb domain protein 73
BnaA06g21090D	-1.10796	5e-05	0.000893723	Down	AT3G49530.1	Arabidopsis thaliana|NAC|NAC domain containing protein 62
BnaA01g07630D	-1.05998	0.0004	0.0058016	Down	AT4G34400.1	Arabidopsis thaliana|B3|B3 family protein
BnaC03g52390D	-1.138	5e-05	0.000893723	Down	AT3G49530.1	Arabidopsis thaliana|NAC|NAC domain containing protein 62
BnaC05g07080D	-1.07557	5e-05	0.000893723	Down	AT1G09530.2	Arabidopsis thaliana|bHLH|phytochrome interacting factor 3
BnaA03g31400D	-1.14738	0.0005	0.00704587	Down	AT5G05090.1	Arabidopsis thaliana|G2-like|G2-like family protein
BnaCnng12230D	-1.06419	0.0005	0.00704587	Down	AT1G26780.1	Arabidopsis thaliana|MYB|myb domain protein 117
BnaA02g35490D	-1.17631	5e-05	0.000893723	Down	AT5G56110.1	Arabidopsis thaliana|MYB|myb domain protein 80
BnaC03g54810D	-1.06381	0.00015	0.00243532	Down	AT3G44460.1	Arabidopsis thaliana|bZIP|bZIP family protein
BnaC03g39000D	-1.18872	5e-05	0.000893723	Down	AT3G15210.1	Arabidopsis thaliana|ERF|ethylene responsive element binding factor 4
BnaA09g00170D	-1.18263	5e-05	0.000893723	Down	AT4G01120.1	Arabidopsis thaliana|bZIP|G-box binding factor 2
BnaC08g21160D	-1.19507	5e-05	0.000893723	Down	AT3G49530.1	Arabidopsis thaliana|NAC|NAC domain containing protein 62
BnaC06g35730D	-1.19349	5e-05	0.000893723	Down	AT1G74930.1	Arabidopsis thaliana|ERF|ERF family protein
BnaCnng66020D	-1.20739	5e-05	0.000893723	Down	AT2G38470.1	Arabidopsis thaliana|WRKY|WRKY DNA-binding protein 33
BnaA08g15610D	-1.18051	0.0002	0.00314867	Down	AT4G37260.1	Arabidopsis thaliana|MYB|myb domain protein 73
BnaA07g28000D	-1.18124	0.0001	0.00168735	Down	AT1G69490.1	Arabidopsis thaliana|NAC|NAC-like, activated by AP3/PI
BnaA06g21470D	-1.21998	5e-05	0.000893723	Down	AT5G62020.1	Arabidopsis thaliana|HSF|heat shock transcription factor B2A
BnaC08g48630D	-1.26422	5e-05	0.000893723	Down	AT3G50060.1	Arabidopsis thaliana|MYB|myb domain protein 77
BnaAnng07060D	-1.17851	0.00065	0.00886637	Down	AT5G47220.1	Arabidopsis thaliana|ERF|ethylene responsive element binding factor 2
BnaA01g26030D	-1.27035	5e-05	0.000893723	Down	AT3G19580.2	Arabidopsis thaliana|C2H2|zinc-finger protein 2
BnaCnng32030D	-1.36139	5e-05	0.000893723	Down	AT5G56110.1	Arabidopsis thaliana|MYB|myb domain protein 80
BnaC02g12480D	-1.39581	5e-05	0.000893723	Down	AT5G56110.1	Arabidopsis thaliana|MYB|myb domain protein 80
BnaC01g24660D	-1.37282	5e-05	0.000893723	Down	AT3G46600.3	Arabidopsis thaliana|GRAS|GRAS family protein
BnaA09g00120D	-1.28105	0.00035	0.00515454	Down	AT4G01250.1	Arabidopsis thaliana|WRKY|WRKY family protein
BnaC07g35520D	-1.38031	5e-05	0.000893723	Down	AT4G18880.1	Arabidopsis thaliana|HSF|heat shock transcription factor A4A
BnaA07g26050D	-1.41433	5e-05	0.000893723	Down	AT1G66810.1	Arabidopsis thaliana|C3H|C3H family protein
BnaCnng31550D	-1.42199	5e-05	0.000893723	Down	AT1G12610.1	Arabidopsis thaliana|ERF|ERF family protein
BnaA07g30460D	-1.2584	0.00045	0.00642596	Down	AT1G72830.1	Arabidopsis thaliana|NF-YA|nuclear factor Y, subunit A3
BnaC03g73930D	-1.40518	5e-05	0.000893723	Down	AT3G19580.2	Arabidopsis thaliana|C2H2|zinc-finger protein 2
BnaC05g12270D	-1.45222	5e-05	0.000893723	Down	AT1G16060.2	Arabidopsis thaliana|AP2|ARIA-interacting double AP2 domain protein
BnaA09g13880D	-1.44893	5e-05	0.000893723	Down	AT1G61110.1	Arabidopsis thaliana|NAC|NAC domain containing protein 25
BnaA10g10250D	-1.46749	5e-05	0.000893723	Down	AT5G56110.1	Arabidopsis thaliana|MYB|myb domain protein 80
BnaA07g05580D	-1.38703	5e-05	0.000893723	Down	AT3G24520.1	Arabidopsis thaliana|HSF|heat shock transcription factor C1
BnaC01g26440D	-1.46447	5e-05	0.000893723	Down	AT3G50060.1	Arabidopsis thaliana|MYB|myb domain protein 77
BnaC03g21360D	-1.52041	5e-05	0.000893723	Down	AT2G38470.1	Arabidopsis thaliana|WRKY|WRKY DNA-binding protein 33
BnaC01g10080D	-1.49154	5e-05	0.000893723	Down	AT4G17490.1	Arabidopsis thaliana|ERF|ethylene responsive element binding factor 6
BnaC08g48600D	-1.37979	0.0007	0.00947493	Down	AT3G49690.1	Arabidopsis thaliana|MYB|myb domain protein 84
BnaA08g01830D	-1.55923	5e-05	0.000893723	Down	AT1G51700.1	Arabidopsis thaliana|Dof|DOF zinc finger protein 1
BnaA03g40690D	-1.57612	5e-05	0.000893723	Down	AT3G50060.1	Arabidopsis thaliana|MYB|myb domain protein 77
BnaC03g77910D	-1.55695	5e-05	0.000893723	Down	AT1G51700.1	Arabidopsis thaliana|Dof|DOF zinc finger protein 1
BnaC02g05100D	-1.5527	5e-05	0.000893723	Down	AT5G14010.1	Arabidopsis thaliana|C2H2|C2H2 family protein
BnaC09g20100D	-1.50853	5e-05	0.000893723	Down	AT5G47230.1	Arabidopsis thaliana|ERF|ethylene responsive element binding factor 5
BnaA08g18380D	-1.58792	5e-05	0.000893723	Down	AT1G28370.1	Arabidopsis thaliana|ERF|ERF domain protein 11
BnaC03g52080D	-1.55321	5e-05	0.000893723	Down	AT5G62020.1	Arabidopsis thaliana|HSF|heat shock transcription factor B2A
BnaC04g49870D	-1.63356	5e-05	0.000893723	Down	AT2G44840.1	Arabidopsis thaliana|ERF|ethylene-responsive element binding factor 13
BnaA08g01300D	-1.58953	5e-05	0.000893723	Down	AT3G15210.1	Arabidopsis thaliana|ERF|ethylene responsive element binding factor 4
BnaC05g17200D	-1.64865	5e-05	0.000893723	Down	AT1G21910.1	Arabidopsis thaliana|ERF|ERF family protein
BnaCnng14500D	-1.69434	5e-05	0.000893723	Down	AT1G65620.3	Arabidopsis thaliana|LBD|LBD family protein
BnaC04g06800D	-1.46995	5e-05	0.000893723	Down	AT2G38470.1	Arabidopsis thaliana|WRKY|WRKY DNA-binding protein 33
BnaA05g34850D	-1.67156	5e-05	0.000893723	Down	AT2G38470.1	Arabidopsis thaliana|WRKY|WRKY DNA-binding protein 33
BnaA07g11930D	-1.72603	5e-05	0.000893723	Down	AT5G67300.1	Arabidopsis thaliana|MYB|myb domain protein r1
BnaA08g11220D	-1.71165	5e-05	0.000893723	Down	AT4G34410.1	Arabidopsis thaliana|ERF|redox responsive transcription factor 1
BnaC01g03990D	-1.66266	5e-05	0.000893723	Down	AT4G34410.1	Arabidopsis thaliana|ERF|redox responsive transcription factor 1
BnaAnng01320D	-1.62533	5e-05	0.000893723	Down	AT5G05410.1	Arabidopsis thaliana|ERF|DRE-binding protein 2A
BnaC03g66140D	-1.72285	5e-05	0.000893723	Down	AT4G34410.1	Arabidopsis thaliana|ERF|redox responsive transcription factor 1
BnaCnng67070D	-1.76096	5e-05	0.000893723	Down	AT1G28370.1	Arabidopsis thaliana|ERF|ERF domain protein 11
BnaA01g34910D	-1.76382	5e-05	0.000893723	Down	AT4G17490.1	Arabidopsis thaliana|ERF|ethylene responsive element binding factor 6
BnaA01g02720D	-1.74813	5e-05	0.000893723	Down	AT4G34410.1	Arabidopsis thaliana|ERF|redox responsive transcription factor 1
BnaC07g16030D	-1.76153	5e-05	0.000893723	Down	AT5G67300.1	Arabidopsis thaliana|MYB|myb domain protein r1
BnaA01g21090D	-1.77994	5e-05	0.000893723	Down	AT3G50060.1	Arabidopsis thaliana|MYB|myb domain protein 77
BnaCnng63180D	-1.76076	5e-05	0.000893723	Down	AT1G28370.1	Arabidopsis thaliana|ERF|ERF domain protein 11
BnaC03g20650D	-1.55375	5e-05	0.000893723	Down	AT2G37260.1	Arabidopsis thaliana|WRKY|WRKY family protein
BnaA07g08440D	-1.82061	5e-05	0.000893723	Down	AT1G28370.1	Arabidopsis thaliana|ERF|ERF domain protein 11
BnaAnng34260D	-1.81201	5e-05	0.000893723	Down	AT4G25470.1	Arabidopsis thaliana|ERF|C-repeat/DRE binding factor 2
BnaA09g18210D	-1.75554	5e-05	0.000893723	Down	AT5G47230.1	Arabidopsis thaliana|ERF|ethylene responsive element binding factor 5
BnaC03g11570D	-1.80758	5e-05	0.000893723	Down	AT5G59820.1	Arabidopsis thaliana|C2H2|C2H2 family protein
BnaC04g21660D	-1.82444	5e-05	0.000893723	Down	AT2G46400.1	Arabidopsis thaliana|WRKY|WRKY DNA-binding protein 46
BnaA03g17820D	-1.87387	5e-05	0.000893723	Down	AT2G38470.1	Arabidopsis thaliana|WRKY|WRKY DNA-binding protein 33
BnaC08g26910D	-1.88861	5e-05	0.000893723	Down	AT3G55980.1	Arabidopsis thaliana|C3H|salt-inducible zinc finger 1
BnaC06g23170D	-1.70115	5e-05	0.000893723	Down	AT1G74250.1	Arabidopsis thaliana|C2H2|DNAJ heat shock N-terminal domain-containing protein
BnaA05g28580D	-1.95615	5e-05	0.000893723	Down	AT3G55980.1	Arabidopsis thaliana|C3H|salt-inducible zinc finger 1
BnaA02g12180D	-1.91725	5e-05	0.000893723	Down	AT1G65620.3	Arabidopsis thaliana|LBD|LBD family protein
BnaC07g31350D	-1.9302	5e-05	0.000893723	Down	AT5G61600.1	Arabidopsis thaliana|ERF|ethylene response factor 104
BnaC09g49920D	-1.99592	5e-05	0.000893723	Down	AT5G05410.1	Arabidopsis thaliana|ERF|DRE-binding protein 2A
BnaC07g31640D	-2.00933	5e-05	0.000893723	Down	AT3G50060.1	Arabidopsis thaliana|MYB|myb domain protein 77
BnaA07g17280D	-1.86104	5e-05	0.000893723	Down	AT3G57390.1	Arabidopsis thaliana|MIKC_MADS|AGAMOUS-like 18
BnaA03g40380D	-1.93234	5e-05	0.000893723	Down	AT5G61600.1	Arabidopsis thaliana|ERF|ethylene response factor 104
BnaC06g43390D	-1.93972	5e-05	0.000893723	Down	AT1G69570.1	Arabidopsis thaliana|Dof|Dof family protein
BnaC09g28190D	-1.96698	0.0001	0.00168735	Down	AT5G51990.1	Arabidopsis thaliana|ERF|C-repeat-binding factor 4
BnaA02g06780D	-2.00518	0.00065	0.00886637	Down	AT5G59820.1	Arabidopsis thaliana|C2H2|C2H2 family protein
BnaA09g27780D	-2.13578	5e-05	0.000893723	Down	AT1G27730.1	Arabidopsis thaliana|C2H2|salt tolerance zinc finger
BnaA04g25900D	-2.10815	5e-05	0.000893723	Down	AT2G44840.1	Arabidopsis thaliana|ERF|ethylene-responsive element binding factor 13
BnaAnng41280D	-2.15167	5e-05	0.000893723	Down	AT1G69570.1	Arabidopsis thaliana|Dof|Dof family protein
BnaC09g27360D	-2.25956	5e-05	0.000893723	Down	AT5G51190.1	Arabidopsis thaliana|ERF|ERF family protein
BnaA08g18790D	-2.30174	5e-05	0.000893723	Down	AT1G27730.1	Arabidopsis thaliana|C2H2|salt tolerance zinc finger
BnaC05g21480D	-2.30776	5e-05	0.000893723	Down	AT1G27730.1	Arabidopsis thaliana|C2H2|salt tolerance zinc finger
BnaA04g00590D	-2.11919	0.0001	0.00168735	Down	AT2G46400.1	Arabidopsis thaliana|WRKY|WRKY DNA-binding protein 46
BnaC03g58080D	-2.41983	5e-05	0.000893723	Down	AT1G27730.1	Arabidopsis thaliana|C2H2|salt tolerance zinc finger
BnaC07g45030D	-2.24142	0.0001	0.00168735	Down	AT4G34410.1	Arabidopsis thaliana|ERF|redox responsive transcription factor 1
BnaC06g22710D	-2.45177	5e-05	0.000893723	Down	AT1G74930.1	Arabidopsis thaliana|ERF|ERF family protein
BnaA06g40170D	-2.38617	5e-05	0.000893723	Down	AT5G47230.1	Arabidopsis thaliana|ERF|ethylene responsive element binding factor 5
BnaA07g31860D	-2.54594	5e-05	0.000893723	Down	AT1G74930.1	Arabidopsis thaliana|ERF|ERF family protein
BnaA07g24230D	-2.50118	5e-05	0.000893723	Down	AT1G69570.1	Arabidopsis thaliana|Dof|Dof family protein
BnaC08g36830D	-2.57335	5e-05	0.000893723	Down	AT1G19210.1	Arabidopsis thaliana|ERF|ERF family protein
BnaA07g21980D	-2.64863	5e-05	0.000893723	Down	AT1G74930.1	Arabidopsis thaliana|ERF|ERF family protein
BnaA10g12780D	-2.72397	5e-05	0.000893723	Down	AT5G59820.1	Arabidopsis thaliana|C2H2|C2H2 family protein
BnaC04g16100D	-2.52563	5e-05	0.000893723	Down	AT2G28200.1	Arabidopsis thaliana|C2H2|C2H2 family protein
BnaA03g41540D	-2.60978	5e-05	0.000893723	Down	AT3G51910.1	Arabidopsis thaliana|HSF|heat shock transcription factor A7A
BnaA03g09250D	-2.97297	5e-05	0.000893723	Down	AT5G59820.1	Arabidopsis thaliana|C2H2|C2H2 family protein
BnaA03g04050D	-2.44232	5e-05	0.000893723	Down	AT5G12870.1	Arabidopsis thaliana|MYB|myb domain protein 46
BnaC09g35160D	-3.11421	5e-05	0.000893723	Down	AT5G59820.1	Arabidopsis thaliana|C2H2|C2H2 family protein
BnaC03g26940D	-3.02156	5e-05	0.000893723	Down	AT2G26150.1	Arabidopsis thaliana|HSF|heat shock transcription factor A2
BnaA10g07630D	-3.08683	5e-05	0.000893723	Down	AT5G51990.1	Arabidopsis thaliana|ERF|C-repeat-binding factor 4
BnaA03g22890D	-3.22424	5e-05	0.000893723	Down	AT2G26150.1	Arabidopsis thaliana|HSF|heat shock transcription factor A2
BnaAnng06930D	-3.33584	5e-05	0.000893723	Down	AT5G61620.1	Arabidopsis thaliana|MYB_related|MYB_related family protein
BnaC07g20410D	-3.26096	5e-05	0.000893723	Down	AT5G47670.2	Arabidopsis thaliana|NF-YB|nuclear factor Y, subunit B6
BnaC03g23960D	-2.90538	5e-05	0.000893723	Down	AT2G43000.1	Arabidopsis thaliana|NAC|NAC domain containing protein 42
BnaA03g19960D	-2.90927	0.00055	0.00768492	Down	AT2G43000.1	Arabidopsis thaliana|NAC|NAC domain containing protein 42
BnaCnng78580D	-4.71634	5e-05	0.000893723	Down	AT1G06280.1	Arabidopsis thaliana|LBD|LOB domain-containing protein 2
BnaA08g28560D	-5.23428	5e-05	0.000893723	Down	AT1G06280.1	Arabidopsis thaliana|LBD|LOB domain-containing protein 2
BnaC01g40520D	-5.97643	5e-05	0.000893723	Down	AT3G03760.1	Arabidopsis thaliana|LBD|LOB domain-containing protein 20
BnaA01g21300D	-3.89368	5e-05	0.000893723	Down	AT3G50510.1	Arabidopsis thaliana|LBD|LOB domain-containing protein 28
BnaA02g16210D	-3.71582	5e-05	0.000893723	Down	AT1G72980.1	Arabidopsis thaliana|LBD|LOB domain-containing protein 7
BnaA03g18740D	-3.85023	5e-05	0.000893723	Down	AT4G03170.1	Arabidopsis thaliana|B3|B3 family protein
BnaA04g22560D	-3.45598	5e-05	0.000893723	Down	AT4G03170.1	Arabidopsis thaliana|B3|B3 family protein
BnaA07g29370D	-4.58383	0.0006	0.00828799	Down	AT1G71450.1	Arabidopsis thaliana|ERF|ERF family protein
BnaA08g24340D	-3.15292	5e-05	0.000893723	Down	AT1G13300.1	Arabidopsis thaliana|G2-like|G2-like family protein
BnaAnng15440D	-3.01223	5e-05	0.000893723	Down	AT1G08010.2	Arabidopsis thaliana|GATA|GATA transcription factor 11
BnaC02g21690D	-2.96986	5e-05	0.000893723	Down	AT1G72980.1	Arabidopsis thaliana|LBD|LOB domain-containing protein 7
BnaC03g71210D	-4.48816	5e-05	0.000893723	Down	AT5G04390.1	Arabidopsis thaliana|C2H2|C2H2 family protein
BnaCnng51960D	-4.31965	5e-05	0.000893723	Down	AT2G32460.2	Arabidopsis thaliana|MYB|myb domain protein 101
BnaA06g21780D	-7.33024	5e-05	0.000893723	Down	AT5G62320.1	Arabidopsis thaliana|MYB|myb domain protein 99
BnaC03g51750D	-7.47957	5e-05	0.000893723	Down	AT5G62320.1	Arabidopsis thaliana|MYB|myb domain protein 99
