# Supplementary material for: The initial deficiency of protein processing and flavonoids biosynthesis were the main mechanisms for the male sterility induced by SX-1 in Brassica napus
Source: BMC Genomics. 2018 Nov 7;19:806. doi: 10.1186/s12864-018-5203-y (PMC6223035; doi:10.1186/s12864-018-5203-y)
Supplement: Supplementary file 5 — Enriched KEGG pathway identified from up- and down-regulated genes. Pathways were considered enriched at P < 0.05. (XLSX 21 kb) [file 12864_2018_5203_MOESM5_ESM.xlsx]

## Sheet: sheet1
Additional file 5. Enriched KEGG pathway identified from up- and down-regulated genes. Pathways were considered enriched at P < 0.05
Stage	#Term	ID	Input number	Background number	P-Value	Corrected P-Value
YB-up	Linoleic acid metabolism	ath00591	8	9	3.34656e-08	3.44696e-06
	Tryptophan metabolism	ath00380	11	46	3.07621e-06	0.000140034
	Biosynthesis of secondary metabolites	ath01110	69	1076	4.07867e-06	0.000140034
	alpha-Linolenic acid metabolism	ath00592	9	36	1.79734e-05	0.000462816
	Sesquiterpenoid and triterpenoid biosynthesis	ath00909	6	23	0.000380032	0.00687389
	Protein processing in endoplasmic reticulum	ath04141	19	212	0.000400421	0.00687389
	Metabolic pathways	ath01100	95	1910	0.000775479	0.0114106
	Glucosinolate biosynthesis	ath00966	5	19	0.00114193	0.0147024
YB-down	Plant-pathogen interaction	ath04626	21	167	2.45132e-05	0.00191203
	Flavonoid biosynthesis	ath00941	6	21	0.000598134	0.0196873
	Vitamin B6 metabolism	ath00750	5	14	0.000757202	0.0196873
	Protein processing in endoplasmic reticulum	ath04141	20	212	0.00118678	0.0231422
SA-up	Metabolic pathways	ath01100	252	1910	1.11029e-15	1.24352e-13
	Biosynthesis of secondary metabolites	ath01110	159	1076	1.31228e-13	7.34876e-12
	Circadian rhythm - plant	ath04712	21	36	1.19451e-10	4.4595e-09
	Plant hormone signal transduction	ath04075	57	271	2.8841e-10	8.07547e-09
	Fatty acid degradation	ath00071	20	41	3.53793e-09	7.92496e-08
	Tryptophan metabolism	ath00380	18	46	2.97392e-07	5.26486e-06
	Fatty acid biosynthesis	ath00061	17	41	3.29054e-07	5.26486e-06
	Flavonoid biosynthesis	ath00941	12	21	1.37468e-06	1.92455e-05
	Carotenoid biosynthesis	ath00906	13	29	4.04284e-06	5.03109e-05
	Peroxisome	ath04146	22	87	7.07736e-06	7.60653e-05
	Fatty acid metabolism	ath01212	19	67	7.4707e-06	7.60653e-05
	Phenylpropanoid biosynthesis	ath00940	28	157	0.000118144	0.00110268
	Fatty acid elongation	ath00062	11	35	0.000293819	0.00253136
	Glycerolipid metabolism	ath00561	13	53	0.000654535	0.00523628
	alpha-Linolenic acid metabolism	ath00592	10	36	0.00121848	0.00909802
	Ribosome	ath03010	46	363	0.00137196	0.00960371
	Phenylalanine metabolism	ath00360	10	42	0.00320853	0.0211385
	Carbon metabolism	ath01200	34	262	0.00386943	0.0240765
	Pentose and glucuronate interconversions	ath00040	14	81	0.00705481	0.0398034
	Glycolysis / Gluconeogenesis	ath00010	18	117	0.00717727	0.0398034
	Lysine degradation	ath00310	7	26	0.00746314	0.0398034
	Glyoxylate and dicarboxylate metabolism	ath00630	13	74	0.00822401	0.0418677
SA-down	Protein processing in endoplasmic reticulum	ath04141	60	212	8.65343e-13	8.13422e-11
	Spliceosome	ath03040	44	192	1.80585e-07	8.48747e-06
	Phenylpropanoid biosynthesis	ath00940	30	157	0.000264456	0.00628583
	Ubiquitin mediated proteolysis	ath04120	28	142	0.000267482	0.00628583
	Amino sugar and nucleotide sugar metabolism	ath00520	24	135	0.00240881	0.0452857
	Galactose metabolism	ath00052	13	55	0.0030135	0.0472115
MA-up	AGE-RAGE signaling pathway in diabetic complications	ath04933	10	20	5.52056e-05	0.0059622
	Pentose and glucuronate interconversions	ath00040	18	81	0.000568456	0.0306966
MA-down	Plant hormone signal transduction	ath04075	36	271	4.99185e-13	4.49266e-11
	Metabolic pathways	ath01100	109	1910	2.90506e-11	1.30728e-09
	Protein processing in endoplasmic reticulum	ath04141	27	212	9.47761e-10	2.84328e-08
	Amino sugar and nucleotide sugar metabolism	ath00520	19	135	7.03397e-08	1.49439e-06
	Vitamin B6 metabolism	ath00750	8	14	8.30216e-08	1.49439e-06
	Fructose and mannose metabolism	ath00051	13	64	2.10288e-07	3.15433e-06
	Diterpenoid biosynthesis	ath00904	8	22	1.24564e-06	1.60154e-05
	Oxidative phosphorylation	ath00190	16	162	4.46268e-05	0.000502051
	Protein export	ath03060	8	53	0.000291537	0.00291537
	Starch and sucrose metabolism	ath00500	16	202	0.000464626	0.00418164
	Glycerolipid metabolism	ath00561	7	53	0.00140672	0.0115095
	Biosynthesis of secondary metabolites	ath01110	48	1076	0.00270733	0.0203049
	Pyruvate metabolism	ath00620	8	85	0.00461813	0.0319717
	Fatty acid elongation	ath00062	5	35	0.00499057	0.0320822
	Galactose metabolism	ath00052	6	55	0.00714247	0.0428548
	Pyrimidine metabolism	ath00240	9	116	0.00872904	0.0491008
LA-up	Plant hormone signal transduction	ath04075	226	271	6.60123e-18	7.5254e-16
	Biosynthesis of secondary metabolites	ath01110	576	1076	1.54328e-11	8.79667e-10
	Metabolic pathways	ath01100	929	1910	1.38939e-10	5.27968e-09
	Carbon metabolism	ath01200	178	262	2.77681e-09	7.9139e-08
	Glyoxylate and dicarboxylate metabolism	ath00630	66	74	5.81827e-07	1.32657e-05
	Plant-pathogen interaction	ath04626	110	167	7.30372e-06	0.000138771
	Carbon fixation in photosynthetic organisms	ath00710	58	69	9.31564e-06	0.000151712
	Peroxisome	ath04146	65	87	3.78172e-05	0.000518333
	Glutathione metabolism	ath00480	68	93	4.0921e-05	0.000518333
	Ubiquinone and other terpenoid-quinone biosynthesis	ath00130	33	35	0.000183376	0.00209049
	Valine, leucine and isoleucine degradation	ath00280	40	48	0.000241189	0.0024996
	Porphyrin and chlorophyll metabolism	ath00860	39	48	0.000405909	0.00385614
	Tyrosine metabolism	ath00350	34	40	0.000536882	0.00470804
	Cyanoamino acid metabolism	ath00460	44	60	0.000824622	0.00671478
	Limonene and pinene degradation	ath00903	34	44	0.00167396	0.0127221
	Tropane, piperidine and pyridine alkaloid biosynthesis	ath00960	29	36	0.00232671	0.0165778
	Fatty acid degradation	ath00071	31	41	0.0032999	0.0221287
	Circadian rhythm - plant	ath04712	27	36	0.00631991	0.0372661
	beta-Alanine metabolism	ath00410	29	40	0.00661758	0.0372661
	Phenylalanine metabolism	ath00360	30	42	0.00672996	0.0372661
	Stilbenoid, diarylheptanoid and gingerol biosynthesis	ath00945	32	46	0.00689093	0.0372661
	Pyruvate metabolism	ath00620	51	85	0.00719171	0.0372661
	Cysteine and methionine metabolism	ath00270	63	112	0.00875964	0.0434173
	Zeatin biosynthesis	ath00908	19	23	0.0104887	0.0482648
	Alanine, aspartate and glutamate metabolism	ath00250	32	48	0.0105844	0.0482648
LA-down	Metabolic pathways	ath01100	1155	1910	1.75841e-53	2.02217e-51
	Oxidative phosphorylation	ath00190	150	162	1.01058e-17	5.81085e-16
	Carbon metabolism	ath01200	184	262	3.31475e-13	9.71168e-12
	Biosynthesis of secondary metabolites	ath01110	542	1076	3.37798e-13	9.71168e-12
	Biosynthesis of amino acids	ath01230	178	255	1.15674e-12	2.66051e-11
	Starch and sucrose metabolism	ath00500	145	202	3.35272e-11	6.42605e-10
	Endocytosis	ath04144	111	142	2.12947e-10	3.49842e-09
	Pentose and glucuronate interconversions	ath00040	76	81	6.81495e-10	9.79649e-09
	Glycolysis / Gluconeogenesis	ath00010	94	117	1.89687e-09	2.42378e-08
	Phosphatidylinositol signaling system	ath04070	64	68	1.3477e-08	1.54985e-07
	Protein processing in endoplasmic reticulum	ath04141	136	212	2.24429e-08	2.3463e-07
	Inositol phosphate metabolism	ath00562	62	68	4.89531e-08	4.69134e-07
	Glycerophospholipid metabolism	ath00564	71	86	8.21252e-08	7.26493e-07
	Pyruvate metabolism	ath00620	68	85	3.40515e-07	2.79709e-06
	Fructose and mannose metabolism	ath00051	55	64	9.64918e-07	7.39771e-06
	Glycine, serine and threonine metabolism	ath00260	58	72	2.05963e-06	1.48036e-05
	Plant-pathogen interaction	ath04626	104	167	2.51431e-06	1.70086e-05
	Protein export	ath03060	47	53	3.2434e-06	2.07217e-05
	Glyoxylate and dicarboxylate metabolism	ath00630	56	74	1.11621e-05	6.68428e-05
	Galactose metabolism	ath00052	46	55	1.16248e-05	6.68428e-05
	Steroid biosynthesis	ath00100	34	35	2.0682e-05	0.000113259
	Alanine, aspartate and glutamate metabolism	ath00250	39	48	8.0211e-05	0.000419285
	Cysteine and methionine metabolism	ath00270	69	112	0.000142041	0.000710205
	Citrate cycle (TCA cycle)	ath00020	45	63	0.000198043	0.000948955
	Fatty acid degradation	ath00071	33	41	0.000309427	0.00142336
	Sulfur metabolism	ath00920	32	41	0.000549552	0.00243071
	Glycerolipid metabolism	ath00561	37	53	0.000945431	0.00402684
	Purine metabolism	ath00230	84	158	0.00102895	0.00422606
	Flavonoid biosynthesis	ath00941	19	21	0.002324	0.00921588
	Arginine and proline metabolism	ath00330	35	53	0.00251047	0.00962347
	Glycosylphosphatidylinositol(GPI)-anchor biosynthesis	ath00563	20	24	0.00344422	0.0127769
	Phenylalanine metabolism	ath00360	29	42	0.00358157	0.0128713
	Phenylalanine, tyrosine and tryptophan biosynthesis	ath00400	36	57	0.00375882	0.0130989
	Folate biosynthesis	ath00790	18	22	0.00614049	0.0207693
	Fatty acid biosynthesis	ath00061	27	41	0.00756638	0.0243068
	Butanoate metabolism	ath00650	15	17	0.00760908	0.0243068
	Nucleotide excision repair	ath03420	39	69	0.010188	0.0316655
	Lysine degradation	ath00310	19	26	0.0111621	0.0330453
	Homologous recombination	ath03440	33	56	0.0112067	0.0330453
	Valine, leucine and isoleucine degradation	ath00280	29	48	0.0132532	0.0381029
