# Supplementary material for: The initial deficiency of protein processing and flavonoids biosynthesis were the main mechanisms for the male sterility induced by SX-1 in Brassica napus
Source: BMC Genomics. 2018 Nov 7;19:806. doi: 10.1186/s12864-018-5203-y (PMC6223035; doi:10.1186/s12864-018-5203-y)
Supplement: Supplementary file 7 — All miRNAs identified by miRBase21. (XLSX 32 kb) [file 12864_2018_5203_MOESM7_ESM.xlsx]

## Sheet: sheet1
Additional file 7. All miRNAs identified by miRBase21.
Query	Q_Length	Subject	S_Length	E_Value	Identities
Samples_miRNA_1	25	NoHits
Samples_miRNA_2	22	hvu-miR156b	21	5e-05	1
Samples_miRNA_3	23	NoHits
Samples_miRNA_4	21	NoHits
Samples_miRNA_5	23	aly-miR828-5p	22	1e-06	1
Samples_miRNA_6	22	ath-miR845a	21	9e-07	1
Samples_miRNA_7	20	NoHits
Samples_miRNA_8	24	NoHits
Samples_miRNA_9	22	stu-miR171c-5p	21	0.0002	0.95
Samples_miRNA_10	23	NoHits
Samples_miRNA_11	21	NoHits
Samples_miRNA_12	22	NoHits
Samples_miRNA_13	21	NoHits
Samples_miRNA_14	22	NoHits
Samples_miRNA_15	24	NoHits
Samples_miRNA_16	24	NoHits
Samples_miRNA_17	24	NoHits
Samples_miRNA_18	21	NoHits
Samples_miRNA_19	24	NoHits
Samples_miRNA_20	23	NoHits
Samples_miRNA_21	22	NoHits
Samples_miRNA_22	22	NoHits
Samples_miRNA_23	23	NoHits
Samples_miRNA_24	24	NoHits
Samples_miRNA_25	22	NoHits
Samples_miRNA_26	22	NoHits
Samples_miRNA_27	24	NoHits
Samples_miRNA_28	20	NoHits
Samples_miRNA_29	22	bra-miR6032-5p	21	9e-07	1
Samples_miRNA_30	23	NoHits
Samples_miRNA_31	23	NoHits
Samples_miRNA_32	22	NoHits
Samples_miRNA_33	25	NoHits
Samples_miRNA_34	24	NoHits
Samples_miRNA_35	20	NoHits
Samples_miRNA_36	23	NoHits
Samples_miRNA_37	24	hsa-miR-4646-5p	22	0.004	1
Samples_miRNA_38	24	NoHits
Samples_miRNA_39	24	NoHits
Samples_miRNA_40	23	NoHits
Samples_miRNA_41	22	NoHits
Samples_miRNA_42	24	NoHits
Samples_miRNA_43	22	NoHits
Samples_miRNA_44	20	NoHits
Samples_miRNA_45	24	NoHits
Samples_miRNA_46	22	NoHits
Samples_miRNA_47	22	bra-miR391-5p	21	9e-07	1
Samples_miRNA_48	22	bra-miR172d-5p	21	9e-07	1
Samples_miRNA_49	24	NoHits
Samples_miRNA_50	22	ata-miR390-5p	21	9e-07	1
Samples_miRNA_51	20	NoHits
Samples_miRNA_52	24	NoHits
Samples_miRNA_53	22	NoHits
Samples_miRNA_54	21	NoHits
Samples_miRNA_55	24	NoHits
Samples_miRNA_56	22	NoHits
Samples_miRNA_57	22	NoHits
Samples_miRNA_58	25	NoHits
Samples_miRNA_59	22	NoHits
Samples_miRNA_60	21	NoHits
Samples_miRNA_61	24	NoHits
Samples_miRNA_62	24	NoHits
Samples_miRNA_63	24	NoHits
Samples_miRNA_64	24	NoHits
Samples_miRNA_65	21	NoHits
Samples_miRNA_66	23	bra-miR156e-3p	23	2e-05	1
Samples_miRNA_67	23	NoHits
Samples_miRNA_68	22	NoHits
Samples_miRNA_69	24	NoHits
Samples_miRNA_70	22	NoHits
Samples_miRNA_71	22	NoHits
Samples_miRNA_72	22	NoHits
Samples_miRNA_73	23	NoHits
Samples_miRNA_74	24	NoHits
Samples_miRNA_75	24	NoHits
Samples_miRNA_76	22	NoHits
Samples_miRNA_77	22	NoHits
Samples_miRNA_78	23	NoHits
Samples_miRNA_79	22	bra-miR172c-5p	21	0.0002	0.95
Samples_miRNA_80	23	NoHits
Samples_miRNA_81	22	NoHits
Samples_miRNA_82	22	NoHits
Samples_miRNA_83	24	NoHits
Samples_miRNA_84	22	NoHits
Samples_miRNA_85	24	NoHits
Samples_miRNA_86	23	NoHits
Samples_miRNA_87	20	NoHits
Samples_miRNA_88	24	NoHits
Samples_miRNA_89	22	ata-miR390-5p	21	9e-07	1
Samples_miRNA_90	21	NoHits
Samples_miRNA_91	21	mes-miR156k	21	8e-07	1
Samples_miRNA_92	22	stu-miR166c-5p	21	1e-05	1
Samples_miRNA_93	22	stu-miR166c-5p	21	1e-05	1
Samples_miRNA_94	21	NoHits
Samples_miRNA_95	22	bra-miR164e-5p	22	2e-07	1
Samples_miRNA_96	23	bra-miR403-5p	22	2e-07	1
Samples_miRNA_97	24	NoHits
Samples_miRNA_98	22	stu-miR166a-5p	21	4e-06	1
Samples_miRNA_99	22	stu-miR166a-5p	21	9e-07	1
Samples_miRNA_100	23	NoHits
Samples_miRNA_101	21	mes-miR156k	21	8e-07	1
Samples_miRNA_102	20	bra-miR9556-5p	21	0.003	0.94
Samples_miRNA_103	24	NoHits
Samples_miRNA_104	21	NoHits
Samples_miRNA_105	20	NoHits
Samples_miRNA_106	24	NoHits
Samples_miRNA_107	24	NoHits
Samples_miRNA_108	24	NoHits
Samples_miRNA_109	21	NoHits
Samples_miRNA_110	24	bra-miR5654b	21	1e-06	1
Samples_miRNA_111	22	bra-miR5654b	21	9e-07	1
Samples_miRNA_112	22	NoHits
Samples_miRNA_113	22	NoHits
Samples_miRNA_114	21	NoHits
Samples_miRNA_115	22	NoHits
Samples_miRNA_116	24	NoHits
Samples_miRNA_117	22	NoHits
Samples_miRNA_118	21	aly-miR158a-3p	20	3e-06	1
Samples_miRNA_119	21	NoHits
Samples_miRNA_120	21	NoHits
Samples_miRNA_121	24	NoHits
Samples_miRNA_122	22	NoHits
Samples_miRNA_123	22	mtr-miR169i	22	9e-07	1
Samples_miRNA_124	22	mtr-miR169i	22	9e-07	1
Samples_miRNA_125	22	mtr-miR169i	22	4e-06	1
Samples_miRNA_126	22	mtr-miR169i	22	4e-06	1
Samples_miRNA_127	22	mtr-miR169i	22	4e-06	1
Samples_miRNA_128	22	NoHits
Samples_miRNA_129	24	NoHits
Samples_miRNA_130	22	NoHits
Samples_miRNA_131	22	NoHits
Samples_miRNA_132	20	NoHits
Samples_miRNA_133	23	NoHits
Samples_miRNA_134	23	NoHits
Samples_miRNA_135	22	NoHits
Samples_miRNA_136	24	NoHits
Samples_miRNA_137	24	NoHits
Samples_miRNA_138	22	NoHits
Samples_miRNA_139	22	NoHits
Samples_miRNA_140	23	NoHits
Samples_miRNA_141	22	NoHits
Samples_miRNA_142	22	bra-miR5717	21	4e-06	1
Samples_miRNA_143	22	bra-miR5717	21	9e-07	1
Samples_miRNA_144	22	NoHits
Samples_miRNA_145	24	NoHits
Samples_miRNA_146	24	NoHits
Samples_miRNA_147	20	NoHits
Samples_miRNA_148	22	NoHits
Samples_miRNA_149	21	NoHits
Samples_miRNA_150	23	NoHits
Samples_miRNA_151	23	NoHits
Samples_miRNA_152	24	NoHits
Samples_miRNA_153	24	NoHits
Samples_miRNA_154	22	NoHits
Samples_miRNA_155	24	NoHits
Samples_miRNA_156	22	bra-miR395a-3p	21	9e-07	1
Samples_miRNA_157	24	NoHits
Samples_miRNA_158	22	NoHits
Samples_miRNA_159	25	NoHits
Samples_miRNA_160	21	NoHits
Samples_miRNA_161	21	NoHits
Samples_miRNA_162	24	NoHits
Samples_miRNA_163	21	NoHits
Samples_miRNA_164	21	NoHits
Samples_miRNA_165	21	NoHits
Samples_miRNA_166	21	hvu-miR156b	21	0.0002	0.95
Samples_miRNA_167	22	bra-miR395a-5p	21	9e-07	1
Samples_miRNA_168	25	bra-miR395a-5p	21	1e-06	1
Samples_miRNA_169	23	NoHits
Samples_miRNA_170	24	NoHits
Samples_miRNA_171	20	bra-miR9556-5p	21	0.003	0.94
Samples_miRNA_172	22	NoHits
Samples_miRNA_173	22	mtr-miR169i	22	5e-05	1
Samples_miRNA_174	22	mtr-miR169i	22	5e-05	1
Samples_miRNA_175	22	mtr-miR169i	22	5e-05	1
Samples_miRNA_176	21	NoHits
Samples_miRNA_177	23	NoHits
Samples_miRNA_178	24	NoHits
Samples_miRNA_179	21	NoHits
Samples_miRNA_180	23	bra-miR158-5p	22	2e-07	1
Samples_miRNA_181	22	NoHits
Samples_miRNA_182	22	NoHits
Samples_miRNA_183	22	NoHits
Samples_miRNA_184	22	NoHits
Samples_miRNA_185	24	NoHits
Samples_miRNA_186	23	NoHits
Samples_miRNA_187	24	NoHits
Samples_miRNA_188	22	mes-miR169h	21	9e-07	1
Samples_miRNA_189	20	NoHits
Samples_miRNA_190	22	NoHits
Samples_miRNA_191	24	NoHits
Samples_miRNA_192	22	bra-miR395a-5p	21	9e-07	1
Samples_miRNA_193	21	NoHits
Samples_miRNA_194	25	bra-miR164c-5p	21	1e-06	1
Samples_miRNA_195	22	bra-miR164c-3p	21	1e-05	1
Samples_miRNA_196	22	mes-miR399f	21	9e-07	1
Samples_miRNA_197	19	NoHits
Samples_miRNA_198	21	NoHits
Samples_miRNA_199	20	NoHits
Samples_miRNA_200	22	NoHits
Samples_miRNA_201	22	NoHits
Samples_miRNA_202	23	NoHits
Samples_miRNA_203	22	sly-miR168a-3p	21	0.0002	0.95
Samples_miRNA_204	23	bra-miR168a-5p	21	1e-06	1
Samples_miRNA_205	22	bra-miR168a-5p	21	9e-07	1
Samples_miRNA_206	21	NoHits
Samples_miRNA_207	22	NoHits
Samples_miRNA_208	23	NoHits
Samples_miRNA_209	22	NoHits
Samples_miRNA_210	22	NoHits
Samples_miRNA_211	24	NoHits
Samples_miRNA_212	21	NoHits
Samples_miRNA_213	23	NoHits
Samples_miRNA_214	20	NoHits
Samples_miRNA_215	22	aly-miR827-5p	21	1e-05	1
Samples_miRNA_216	24	NoHits
Samples_miRNA_217	22	NoHits
Samples_miRNA_218	24	NoHits
Samples_miRNA_219	22	NoHits
Samples_miRNA_220	24	NoHits
Samples_miRNA_221	22	NoHits
Samples_miRNA_222	22	hsa-miR-3150b-3p	21	0.003	1
Samples_miRNA_223	22	NoHits
Samples_miRNA_224	23	NoHits
Samples_miRNA_225	22	NoHits
Samples_miRNA_226	24	NoHits
Samples_miRNA_227	22	NoHits
Samples_miRNA_228	22	bra-miR391-5p	21	9e-07	1
Samples_miRNA_229	24	NoHits
Samples_miRNA_230	20	NoHits
Samples_miRNA_231	24	NoHits
Samples_miRNA_232	22	NoHits
Samples_miRNA_233	22	aly-miR166b-5p	21	9e-07	1
Samples_miRNA_234	22	NoHits
Samples_miRNA_235	22	NoHits
Samples_miRNA_236	22	NoHits
Samples_miRNA_237	23	NoHits
Samples_miRNA_238	22	NoHits
Samples_miRNA_239	22	bra-miR5712	21	0.0002	0.95
Samples_miRNA_240	22	NoHits
Samples_miRNA_241	23	NoHits
Samples_miRNA_242	20	NoHits
Samples_miRNA_243	23	NoHits
Samples_miRNA_244	23	NoHits
Samples_miRNA_245	23	NoHits
Samples_miRNA_246	22	NoHits
Samples_miRNA_247	22	NoHits
Samples_miRNA_248	22	NoHits
Samples_miRNA_249	22	ata-miR390-5p	21	9e-07	1
Samples_miRNA_250	23	NoHits
Samples_miRNA_251	22	NoHits
Samples_miRNA_252	22	NoHits
Samples_miRNA_253	23	NoHits
Samples_miRNA_254	22	NoHits
Samples_miRNA_255	22	NoHits
Samples_miRNA_256	22	NoHits
Samples_miRNA_257	23	NoHits
Samples_miRNA_258	21	NoHits
Samples_miRNA_259	24	NoHits
Samples_miRNA_260	21	NoHits
Samples_miRNA_261	22	NoHits
Samples_miRNA_262	22	NoHits
Samples_miRNA_263	22	NoHits
Samples_miRNA_264	22	NoHits
Samples_miRNA_265	20	NoHits
Samples_miRNA_266	22	NoHits
Samples_miRNA_267	22	NoHits
Samples_miRNA_268	22	NoHits
Samples_miRNA_269	22	NoHits
Samples_miRNA_270	21	ata-miR394-5p	20	3e-06	1
Samples_miRNA_271	22	NoHits
Samples_miRNA_272	22	NoHits
Samples_miRNA_273	22	NoHits
Samples_miRNA_274	23	NoHits
Samples_miRNA_275	23	NoHits
Samples_miRNA_276	23	NoHits
Samples_miRNA_277	24	NoHits
Samples_miRNA_278	23	NoHits
Samples_miRNA_279	20	NoHits
Samples_miRNA_280	22	NoHits
Samples_miRNA_281	21	NoHits
Samples_miRNA_282	22	NoHits
Samples_miRNA_283	22	bra-miR395a-5p	21	9e-07	1
Samples_miRNA_284	21	NoHits
Samples_miRNA_285	24	NoHits
Samples_miRNA_286	22	NoHits
Samples_miRNA_287	24	NoHits
Samples_miRNA_288	22	bra-miR9559-3p	21	1e-05	1
Samples_miRNA_289	23	NoHits
Samples_miRNA_290	21	NoHits
Samples_miRNA_291	22	NoHits
Samples_miRNA_292	22	NoHits
Samples_miRNA_293	21	NoHits
Samples_miRNA_294	22	NoHits
Samples_miRNA_295	22	NoHits
Samples_miRNA_296	23	NoHits
Samples_miRNA_297	24	NoHits
Samples_miRNA_298	22	NoHits
Samples_miRNA_299	22	NoHits
Samples_miRNA_300	22	NoHits
Samples_miRNA_301	22	NoHits
Samples_miRNA_302	22	NoHits
Samples_miRNA_303	22	NoHits
Samples_miRNA_304	20	NoHits
Samples_miRNA_305	22	NoHits
Samples_miRNA_306	24	NoHits
Samples_miRNA_307	23	NoHits
Samples_miRNA_308	22	NoHits
Samples_miRNA_309	21	NoHits
Samples_miRNA_310	20	NoHits
Samples_miRNA_311	22	NoHits
Samples_miRNA_312	22	NoHits
Samples_miRNA_313	21	NoHits
Samples_miRNA_314	24	NoHits
Samples_miRNA_315	24	NoHits
Samples_miRNA_316	22	NoHits
Samples_miRNA_317	22	ath-miR845a	21	9e-07	1
Samples_miRNA_318	21	NoHits
Samples_miRNA_319	20	NoHits
Samples_miRNA_320	21	NoHits
Samples_miRNA_321	23	NoHits
Samples_miRNA_322	22	NoHits
Samples_miRNA_323	22	NoHits
Samples_miRNA_324	21	NoHits
Samples_miRNA_325	24	NoHits
Samples_miRNA_326	24	NoHits
Samples_miRNA_327	24	NoHits
Samples_miRNA_328	20	NoHits
Samples_miRNA_329	22	NoHits
Samples_miRNA_330	24	NoHits
Samples_miRNA_331	24	NoHits
Samples_miRNA_332	22	NoHits
Samples_miRNA_333	21	NoHits
Samples_miRNA_334	22	bra-miR2111-5p	21	9e-07	1
Samples_miRNA_335	21	hvu-miR156b	21	8e-07	1
Samples_miRNA_336	23	NoHits
Samples_miRNA_337	25	NoHits
Samples_miRNA_338	24	NoHits
Samples_miRNA_339	23	NoHits
Samples_miRNA_340	22	NoHits
Samples_miRNA_341	22	NoHits
Samples_miRNA_342	22	NoHits
Samples_miRNA_343	24	NoHits
Samples_miRNA_344	22	NoHits
Samples_miRNA_345	24	NoHits
Samples_miRNA_346	20	NoHits
Samples_miRNA_347	22	bra-miR164e-5p	22	2e-07	1
Samples_miRNA_348	25	NoHits
Samples_miRNA_349	22	NoHits
Samples_miRNA_350	22	NoHits
Samples_miRNA_351	22	NoHits
Samples_miRNA_352	22	NoHits
Samples_miRNA_353	24	NoHits
Samples_miRNA_354	22	NoHits
Samples_miRNA_355	23	NoHits
Samples_miRNA_356	22	NoHits
Samples_miRNA_357	24	NoHits
Samples_miRNA_358	22	NoHits
Samples_miRNA_359	22	NoHits
Samples_miRNA_360	24	ppe-miR1511-3p	21	0.001	1
Samples_miRNA_361	24	NoHits
Samples_miRNA_362	22	NoHits
Samples_miRNA_363	24	NoHits
Samples_miRNA_364	21	NoHits
Samples_miRNA_365	25	NoHits
Samples_miRNA_366	22	NoHits
Samples_miRNA_367	25	NoHits
Samples_miRNA_368	24	NoHits
Samples_miRNA_369	21	NoHits
Samples_miRNA_370	23	NoHits
Samples_miRNA_371	22	NoHits
Samples_miRNA_372	22	NoHits
Samples_miRNA_373	24	NoHits
Samples_miRNA_374	25	NoHits
Samples_miRNA_375	22	bra-miR172d-5p	21	9e-07	1
Samples_miRNA_376	24	NoHits
Samples_miRNA_377	22	NoHits
Samples_miRNA_378	24	NoHits
Samples_miRNA_379	22	NoHits
Samples_miRNA_380	22	NoHits
Samples_miRNA_381	22	NoHits
Samples_miRNA_382	22	bol-miR9409	22	0.0002	0.95
Samples_miRNA_383	22	NoHits
Samples_miRNA_384	21	NoHits
Samples_miRNA_385	24	NoHits
Samples_miRNA_386	22	NoHits
Samples_miRNA_387	23	NoHits
Samples_miRNA_388	23	NoHits
Samples_miRNA_389	24	NoHits
Samples_miRNA_390	22	NoHits
Samples_miRNA_391	21	NoHits
Samples_miRNA_392	22	NoHits
Samples_miRNA_393	23	NoHits
Samples_miRNA_394	22	NoHits
Samples_miRNA_395	24	NoHits
Samples_miRNA_396	22	NoHits
Samples_miRNA_397	24	NoHits
Samples_miRNA_398	22	NoHits
Samples_miRNA_399	22	NoHits
Samples_miRNA_400	24	NoHits
Samples_miRNA_401	22	NoHits
Samples_miRNA_402	25	NoHits
Samples_miRNA_403	22	NoHits
Samples_miRNA_404	23	NoHits
Samples_miRNA_405	22	NoHits
Samples_miRNA_406	23	NoHits
Samples_miRNA_407	22	mtr-miR169i	22	9e-07	1
Samples_miRNA_408	22	ata-miR390-5p	21	9e-07	1
Samples_miRNA_409	24	NoHits
Samples_miRNA_410	25	NoHits
Samples_miRNA_411	23	NoHits
Samples_miRNA_412	21	ata-miR169f-5p	21	3e-06	1
Samples_miRNA_413	23	bra-miR403-5p	22	2e-07	1
Samples_miRNA_414	24	NoHits
Samples_miRNA_415	22	stu-miR166a-5p	21	4e-06	1
Samples_miRNA_416	22	stu-miR166a-5p	21	9e-07	1
Samples_miRNA_417	21	mes-miR156k	21	8e-07	1
Samples_miRNA_418	23	NoHits
Samples_miRNA_419	20	bra-miR9556-5p	21	0.003	0.94
Samples_miRNA_420	23	NoHits
Samples_miRNA_421	22	NoHits
Samples_miRNA_422	22	NoHits
Samples_miRNA_423	22	atr-miR171c	21	9e-07	1
Samples_miRNA_424	23	NoHits
Samples_miRNA_425	24	NoHits
Samples_miRNA_426	22	NoHits
Samples_miRNA_427	24	NoHits
Samples_miRNA_428	24	NoHits
Samples_miRNA_429	24	NoHits
Samples_miRNA_430	23	NoHits
Samples_miRNA_431	24	NoHits
Samples_miRNA_432	22	NoHits
Samples_miRNA_433	21	NoHits
Samples_miRNA_434	24	NoHits
Samples_miRNA_435	21	mes-miR156k	21	8e-07	1
Samples_miRNA_436	24	NoHits
Samples_miRNA_437	22	bra-miR164e-5p	22	2e-07	1
Samples_miRNA_438	22	ata-miR164c-5p	21	9e-07	1
Samples_miRNA_439	23	NoHits
Samples_miRNA_440	22	ata-miR390-5p	21	9e-07	1
Samples_miRNA_441	24	NoHits
Samples_miRNA_442	22	NoHits
Samples_miRNA_443	23	NoHits
Samples_miRNA_444	24	NoHits
Samples_miRNA_445	22	NoHits
Samples_miRNA_446	22	NoHits
Samples_miRNA_447	24	NoHits
Samples_miRNA_448	21	NoHits
Samples_miRNA_449	23	NoHits
Samples_miRNA_450	25	NoHits
Samples_miRNA_451	25	NoHits
Samples_miRNA_452	21	NoHits
Samples_miRNA_453	23	NoHits
Samples_miRNA_454	24	NoHits
Samples_miRNA_455	22	NoHits
Samples_miRNA_456	22	NoHits
Samples_miRNA_457	20	NoHits
Samples_miRNA_458	20	NoHits
Samples_miRNA_459	22	NoHits
Samples_miRNA_460	26	bra-miR5654b	21	1e-06	1
Samples_miRNA_461	24	NoHits
Samples_miRNA_462	22	NoHits
Samples_miRNA_463	22	NoHits
Samples_miRNA_464	24	NoHits
Samples_miRNA_465	22	NoHits
Samples_miRNA_466	22	bra-miR5654b	21	9e-07	1
Samples_miRNA_467	22	NoHits
Samples_miRNA_468	23	NoHits
Samples_miRNA_469	22	NoHits
Samples_miRNA_470	22	NoHits
Samples_miRNA_471	24	NoHits
Samples_miRNA_472	22	NoHits
Samples_miRNA_473	21	NoHits
Samples_miRNA_474	23	NoHits
Samples_miRNA_475	23	NoHits
Samples_miRNA_476	21	NoHits
Samples_miRNA_477	22	NoHits
Samples_miRNA_478	21	aly-miR158a-3p	20	3e-06	1
Samples_miRNA_479	22	NoHits
Samples_miRNA_480	22	NoHits
Samples_miRNA_481	22	NoHits
Samples_miRNA_482	24	NoHits
Samples_miRNA_483	22	NoHits
Samples_miRNA_484	23	NoHits
Samples_miRNA_485	24	NoHits
Samples_miRNA_486	21	NoHits
Samples_miRNA_487	22	NoHits
Samples_miRNA_488	23	NoHits
Samples_miRNA_489	23	mtr-miR169i	22	1e-06	1
Samples_miRNA_490	23	mtr-miR169i	22	1e-06	1
Samples_miRNA_491	23	mtr-miR169i	22	1e-06	1
Samples_miRNA_492	22	mtr-miR169i	22	9e-07	1
Samples_miRNA_493	22	mtr-miR169i	22	9e-07	1
Samples_miRNA_494	22	mtr-miR169i	22	9e-07	1
Samples_miRNA_495	22	mtr-miR169i	22	1e-05	1
Samples_miRNA_496	22	mtr-miR169i	22	1e-05	1
Samples_miRNA_497	22	NoHits
Samples_miRNA_498	21	NoHits
Samples_miRNA_499	21	NoHits
Samples_miRNA_500	22	NoHits
Samples_miRNA_501	22	NoHits
Samples_miRNA_502	22	NoHits
Samples_miRNA_503	23	NoHits
Samples_miRNA_504	21	NoHits
Samples_miRNA_505	24	NoHits
Samples_miRNA_506	22	NoHits
Samples_miRNA_507	22	sly-miR395b	22	2e-07	1
Samples_miRNA_508	22	bra-miR395a-5p	21	0.0002	0.95
Samples_miRNA_509	25	NoHits
Samples_miRNA_510	23	NoHits
Samples_miRNA_511	21	NoHits
Samples_miRNA_512	18	NoHits
Samples_miRNA_513	24	NoHits
Samples_miRNA_514	22	NoHits
Samples_miRNA_515	23	NoHits
Samples_miRNA_516	22	ath-miR858b	21	9e-07	1
Samples_miRNA_517	22	NoHits
Samples_miRNA_518	20	NoHits
Samples_miRNA_519	23	NoHits
Samples_miRNA_520	22	NoHits
Samples_miRNA_521	25	NoHits
Samples_miRNA_522	24	NoHits
Samples_miRNA_523	24	NoHits
Samples_miRNA_524	25	NoHits
Samples_miRNA_525	23	NoHits
Samples_miRNA_526	25	NoHits
Samples_miRNA_527	21	NoHits
Samples_miRNA_528	25	NoHits
Samples_miRNA_529	24	NoHits
Samples_miRNA_530	23	NoHits
Samples_miRNA_531	22	NoHits
Samples_miRNA_532	22	stu-miR171c-5p	21	9e-07	1
Samples_miRNA_533	23	NoHits
Samples_miRNA_534	22	NoHits
Samples_miRNA_535	22	NoHits
Samples_miRNA_536	24	ata-miR156c-3p	22	0.0003	1
Samples_miRNA_537	23	NoHits
Samples_miRNA_538	22	NoHits
Samples_miRNA_539	21	NoHits
Samples_miRNA_540	23	NoHits
Samples_miRNA_541	23	NoHits
Samples_miRNA_542	21	NoHits
Samples_miRNA_543	20	NoHits
Samples_miRNA_544	23	bra-miR158-5p	22	2e-07	1
Samples_miRNA_545	24	NoHits
Samples_miRNA_546	24	NoHits
Samples_miRNA_547	24	NoHits
Samples_miRNA_548	25	NoHits
Samples_miRNA_549	24	NoHits
Samples_miRNA_550	22	NoHits
Samples_miRNA_551	22	NoHits
Samples_miRNA_552	24	NoHits
Samples_miRNA_553	23	NoHits
Samples_miRNA_554	21	NoHits
Samples_miRNA_555	22	gma-miR171o-5p	21	0.0009	0.95
Samples_miRNA_556	20	NoHits
Samples_miRNA_557	24	NoHits
Samples_miRNA_558	21	NoHits
Samples_miRNA_559	22	aly-miR827-5p	21	1e-05	1
Samples_miRNA_560	22	aly-miR827-5p	21	1e-05	1
Samples_miRNA_561	21	NoHits
Samples_miRNA_562	24	NoHits
Samples_miRNA_563	22	gga-miR-1696	24	0.0009	1
Samples_miRNA_564	22	NoHits
Samples_miRNA_565	22	NoHits
Samples_miRNA_566	24	NoHits
Samples_miRNA_567	21	NoHits
Samples_miRNA_568	22	NoHits
Samples_miRNA_569	22	NoHits
Samples_miRNA_570	22	NoHits
Samples_miRNA_571	22	bra-miR395a-5p	21	9e-07	1
Samples_miRNA_572	20	NoHits
Samples_miRNA_573	22	NoHits
Samples_miRNA_574	21	ata-miR164c-5p	21	3e-06	1
Samples_miRNA_575	22	bra-miR164c-3p	21	1e-05	1
Samples_miRNA_576	23	NoHits
Samples_miRNA_577	23	NoHits
Samples_miRNA_578	23	NoHits
Samples_miRNA_579	20	NoHits
Samples_miRNA_580	24	NoHits
Samples_miRNA_581	20	NoHits
Samples_miRNA_582	24	ppe-miR1511-3p	21	0.001	1
Samples_miRNA_583	21	NoHits
Samples_miRNA_584	24	NoHits
Samples_miRNA_585	21	NoHits
Samples_miRNA_586	22	NoHits
Samples_miRNA_587	22	NoHits
Samples_miRNA_588	22	NoHits
Samples_miRNA_589	23	NoHits
Samples_miRNA_590	23	NoHits
Samples_miRNA_591	22	NoHits
Samples_miRNA_592	23	NoHits
Samples_miRNA_593	22	NoHits
Samples_miRNA_594	22	NoHits
Samples_miRNA_595	24	NoHits
Samples_miRNA_596	22	NoHits
Samples_miRNA_597	22	NoHits
Samples_miRNA_598	24	NoHits
Samples_miRNA_599	22	NoHits
Samples_miRNA_600	24	NoHits
Samples_miRNA_601	22	NoHits
Samples_miRNA_602	22	aly-miR166b-5p	21	9e-07	1
Samples_miRNA_603	24	NoHits
Samples_miRNA_604	21	NoHits
Samples_miRNA_605	22	NoHits
Samples_miRNA_606	20	NoHits
Samples_miRNA_607	21	NoHits
Samples_miRNA_608	24	NoHits
Samples_miRNA_609	24	NoHits
Samples_miRNA_610	23	NoHits
Samples_miRNA_611	22	aly-miR165b-5p	20	0.0009	0.95
Samples_miRNA_612	25	NoHits
Samples_miRNA_613	20	NoHits
Samples_miRNA_614	22	NoHits
Samples_miRNA_615	22	NoHits
Samples_miRNA_616	21	NoHits
Samples_miRNA_617	24	NoHits
Samples_miRNA_618	24	NoHits
Samples_miRNA_619	22	NoHits
Samples_miRNA_620	22	pab-miR3711	20	0.0002	1
Samples_miRNA_621	22	NoHits
Samples_miRNA_622	24	NoHits
Samples_miRNA_623	23	NoHits
Samples_miRNA_624	21	NoHits
Samples_miRNA_625	21	ata-miR394-5p	20	3e-06	1
Samples_miRNA_626	24	NoHits
Samples_miRNA_627	22	bra-miR395a-5p	21	9e-07	1
Samples_miRNA_628	22	bra-miR395a-5p	21	9e-07	1
Samples_miRNA_629	24	NoHits
Samples_miRNA_630	23	NoHits
Samples_miRNA_631	23	NoHits
Samples_miRNA_632	22	NoHits
Samples_miRNA_633	23	NoHits
Samples_miRNA_634	22	NoHits
Samples_miRNA_635	22	NoHits
Samples_miRNA_636	22	bra-miR391-5p	21	9e-07	1
Samples_miRNA_637	21	NoHits
Samples_miRNA_638	24	NoHits
Samples_miRNA_639	20	NoHits
Samples_miRNA_640	22	NoHits
Samples_miRNA_641	20	NoHits
Samples_miRNA_642	22	NoHits
Samples_miRNA_643	24	NoHits
Samples_miRNA_644	22	NoHits
Samples_miRNA_645	22	NoHits
Samples_miRNA_646	22	stu-miR166c-5p	21	1e-05	1
Samples_miRNA_647	22	csi-miR162-5p	22	2e-07	1
Samples_miRNA_648	23	NoHits
Samples_miRNA_649	22	NoHits
Samples_miRNA_650	22	NoHits
Samples_miRNA_651	24	NoHits
Samples_miRNA_652	22	NoHits
Samples_miRNA_653	22	NoHits
Samples_miRNA_654	21	NoHits
Samples_miRNA_655	21	NoHits
Samples_miRNA_656	23	NoHits
Samples_miRNA_657	21	NoHits
Samples_miRNA_658	22	NoHits
Samples_miRNA_659	22	NoHits
Samples_miRNA_660	22	NoHits
Samples_miRNA_661	22	bol-miR9409	22	0.0009	0.95
Samples_miRNA_662	22	ata-miR390-5p	21	9e-07	1
Samples_miRNA_663	22	NoHits
Samples_miRNA_664	22	NoHits
Samples_miRNA_665	22	NoHits
Samples_miRNA_666	22	NoHits
Samples_miRNA_667	20	NoHits
Samples_miRNA_668	20	NoHits
Samples_miRNA_669	22	NoHits
Samples_miRNA_670	25	NoHits
Samples_miRNA_671	22	aly-miR858-5p	21	9e-07	1
Samples_miRNA_672	22	mtr-miR169i	22	9e-07	1

## Sheet: Sheet2
	#N/A
Samples_miRNA_2	hvu-miR156b		Samples_miRNA_2	hvu-miR156b
Samples_miRNA_63	NoHits		Samples_miRNA_63	NoHits
Samples_miRNA_125	mtr-miR169i		Samples_miRNA_125	mtr-miR169i
Samples_miRNA_126	mtr-miR169i		Samples_miRNA_126	mtr-miR169i
Samples_miRNA_127	mtr-miR169i		Samples_miRNA_127	mtr-miR169i
Samples_miRNA_168	bra-miR395a-5p		Samples_miRNA_168	bra-miR395a-5p
Samples_miRNA_204	bra-miR168a-5p		Samples_miRNA_204	bra-miR168a-5p
Samples_miRNA_465	NoHits		Samples_miRNA_465	NoHits
Samples_miRNA_500	NoHits		Samples_miRNA_500	NoHits
Samples_miRNA_574	ata-miR164c-5p		Samples_miRNA_574	ata-miR164c-5p			定量候选
Samples_miRNA_625	ata-miR394-5p		Samples_miRNA_625	ata-miR394-5p			Samples_miRNA_2	hvu-miR156b
Samples_miRNA_6	ath-miR845a		Samples_miRNA_6	ath-miR845a			Samples_miRNA_125	mtr-miR169i
Samples_miRNA_92	stu-miR166c-5p		Samples_miRNA_92	stu-miR166c-5p			Samples_miRNA_574	ata-miR164c-5p
Samples_miRNA_98	stu-miR166a-5p		Samples_miRNA_98	stu-miR166a-5p			Samples_miRNA_110	bra-miR5654b
Samples_miRNA_111	bra-miR5654b		Samples_miRNA_111	bra-miR5654b			Samples_miRNA_111	bra-miR5654b
Samples_miRNA_118	aly-miR158a-3p		Samples_miRNA_118	aly-miR158a-3p			Samples_miRNA_342	NoHits
Samples_miRNA_258	NoHits		Samples_miRNA_258	NoHits			Samples_miRNA_520	NoHits
Samples_miRNA_317	ath-miR845a		Samples_miRNA_317	ath-miR845a			Samples_miRNA_147	NoHits
Samples_miRNA_342	NoHits		Samples_miRNA_342	NoHits			Samples_miRNA_204	bra-miR168a-5p
Samples_miRNA_349	NoHits		Samples_miRNA_349	NoHits
Samples_miRNA_415	stu-miR166a-5p		Samples_miRNA_415	stu-miR166a-5p
Samples_miRNA_465	NoHits		Samples_miRNA_465	NoHits
Samples_miRNA_470	NoHits		Samples_miRNA_470	NoHits
Samples_miRNA_478	aly-miR158a-3p		Samples_miRNA_478	aly-miR158a-3p
Samples_miRNA_489	mtr-miR169i		Samples_miRNA_489	mtr-miR169i
Samples_miRNA_490	mtr-miR169i		Samples_miRNA_490	mtr-miR169i
Samples_miRNA_491	mtr-miR169i		Samples_miRNA_491	mtr-miR169i
Samples_miRNA_520	NoHits		Samples_miRNA_520	NoHits
Samples_miRNA_538	NoHits		Samples_miRNA_538	NoHits
Samples_miRNA_569	NoHits		Samples_miRNA_569	NoHits
Samples_miRNA_586	NoHits		Samples_miRNA_586	NoHits
Samples_miRNA_615	NoHits		Samples_miRNA_615	NoHits
Samples_miRNA_646	stu-miR166c-5p		Samples_miRNA_646	stu-miR166c-5p
Samples_miRNA_650	NoHits		Samples_miRNA_650	NoHits
Samples_miRNA_660	NoHits		Samples_miRNA_660	NoHits
Samples_miRNA_2	hvu-miR156b		Samples_miRNA_2	hvu-miR156b
Samples_miRNA_7	NoHits		Samples_miRNA_7	NoHits
Samples_miRNA_28	NoHits		Samples_miRNA_28	NoHits
Samples_miRNA_63	NoHits		Samples_miRNA_63	NoHits
Samples_miRNA_99	stu-miR166a-5p		Samples_miRNA_99	stu-miR166a-5p
Samples_miRNA_102	bra-miR9556-5p		Samples_miRNA_102	bra-miR9556-5p
Samples_miRNA_106	NoHits		Samples_miRNA_106	NoHits
Samples_miRNA_110	bra-miR5654b		Samples_miRNA_110	bra-miR5654b
Samples_miRNA_117	NoHits		Samples_miRNA_117	NoHits
Samples_miRNA_118	aly-miR158a-3p		Samples_miRNA_118	aly-miR158a-3p
Samples_miRNA_147	NoHits		Samples_miRNA_147	NoHits
Samples_miRNA_157	NoHits		Samples_miRNA_157	NoHits
Samples_miRNA_180	bra-miR158-5p		Samples_miRNA_180	bra-miR158-5p
Samples_miRNA_198	NoHits		Samples_miRNA_198	NoHits
Samples_miRNA_201	NoHits		Samples_miRNA_201	NoHits
Samples_miRNA_203	sly-miR168a-3p		Samples_miRNA_203	sly-miR168a-3p
Samples_miRNA_278	NoHits		Samples_miRNA_278	NoHits
Samples_miRNA_284	NoHits		Samples_miRNA_284	NoHits
Samples_miRNA_296	NoHits		Samples_miRNA_296	NoHits
Samples_miRNA_346	NoHits		Samples_miRNA_346	NoHits
Samples_miRNA_416	stu-miR166a-5p		Samples_miRNA_416	stu-miR166a-5p
Samples_miRNA_419	bra-miR9556-5p		Samples_miRNA_419	bra-miR9556-5p
Samples_miRNA_460	bra-miR5654b		Samples_miRNA_460	bra-miR5654b
Samples_miRNA_478	aly-miR158a-3p		Samples_miRNA_478	aly-miR158a-3p
Samples_miRNA_480	NoHits		Samples_miRNA_480	NoHits
Samples_miRNA_500	NoHits		Samples_miRNA_500	NoHits
Samples_miRNA_534	NoHits		Samples_miRNA_534	NoHits
Samples_miRNA_544	bra-miR158-5p		Samples_miRNA_544	bra-miR158-5p
Samples_miRNA_567	NoHits		Samples_miRNA_567	NoHits
Samples_miRNA_569	NoHits		Samples_miRNA_569	NoHits
Samples_miRNA_27	NoHits		Samples_miRNA_27	NoHits
Samples_miRNA_111	bra-miR5654b		Samples_miRNA_111	bra-miR5654b
Samples_miRNA_194	bra-miR164c-5p		Samples_miRNA_194	bra-miR164c-5p
Samples_miRNA_201	NoHits		Samples_miRNA_201	NoHits
Samples_miRNA_225	NoHits		Samples_miRNA_225	NoHits
Samples_miRNA_342	NoHits		Samples_miRNA_342	NoHits
Samples_miRNA_345	NoHits		Samples_miRNA_345	NoHits
Samples_miRNA_432	NoHits		Samples_miRNA_432	NoHits
Samples_miRNA_520	NoHits		Samples_miRNA_520	NoHits
Samples_miRNA_2	hvu-miR156b
Samples_miRNA_500	NoHits
Samples_miRNA_574	ata-miR164c-5p
Samples_miRNA_574	ata-miR164c-5p
Samples_miRNA_111	bra-miR5654b
Samples_miRNA_111	bra-miR5654b
Samples_miRNA_111	bra-miR5654b
Samples_miRNA_465	NoHits
Samples_miRNA_2	hvu-miR156b
Samples_miRNA_2	hvu-miR156b
Samples_miRNA_2	hvu-miR156b
Samples_miRNA_28	Samples_miRNA_28
Samples_miRNA_28	Samples_miRNA_28
Samples_miRNA_28	Samples_miRNA_28
Samples_miRNA_28	Samples_miRNA_28
Samples_miRNA_28	Samples_miRNA_28
Samples_miRNA_102	bra-miR9556-5p
Samples_miRNA_110	bra-miR5654b
Samples_miRNA_419	bra-miR9556-5p
Samples_miRNA_419	bra-miR9556-5p
Samples_miRNA_7	NoHits
Samples_miRNA_111	bra-miR5654b
Samples_miRNA_111	bra-miR5654b
Samples_miRNA_111	bra-miR5654b
Samples_miRNA_111	bra-miR5654b
Samples_miRNA_111	bra-miR5654b
Samples_miRNA_111	bra-miR5654b
Samples_miRNA_194	bra-miR164c-5p
Samples_miRNA_520	NoHits
Samples_miRNA_520	NoHits
Samples_miRNA_520	NoHits
Samples_miRNA_520	NoHits
Samples_miRNA_520	NoHits
Samples_miRNA_520	NoHits
Samples_miRNA_520	NoHits
Samples_miRNA_520	NoHits
	#N/A
	#N/A
