# Supplementary material for: The initial deficiency of protein processing and flavonoids biosynthesis were the main mechanisms for the male sterility induced by SX-1 in Brassica napus
Source: BMC Genomics. 2018 Nov 7;19:806. doi: 10.1186/s12864-018-5203-y (PMC6223035; doi:10.1186/s12864-018-5203-y)
Supplement: Supplementary file 10 — DE-miRNA/mRNA modules of inversely and positively related. Inf indicate the miRNA only detected in CHA treated materials, #NAME? indicate the miRNA only detected in control. (XLSX 15 kb) [file 12864_2018_5203_MOESM10_ESM.xlsx]

## Sheet: Sheet1
Additional file 10. DE-miRNA/mRNA modules of inversely and positively related.
Stage	miR-name	fold-change(log2 CHA/CK)	Type	Target ID	log2 Ratio(CHA/CK)	Type	Modules Type	Gene annotation
YB	hvu-miR156b	Inf	Up	BnaCnng61400D	1.34648	Up	Up-Up	Squamosa promoter-binding protein-like
	Samples_miRNA_500	Inf	Up	BnaA04g11510D	-1.40411	DOWN	Up-Down	unknown protein
	ata-miR164c-5p	Inf	Up	BnaC07g36490D	1.15381	UP	Up-Up	MALE-STERILE 5 (MS5)
	ata-miR164c-5p	Inf	Up	BnaA03g44650D	1.04489	UP	Up-Up	MALE-STERILE 5 (MS5)
SA	bra-miR5654b	#NAME?	DOWN	BnaC08g39680D	-1.19981	DOWN	Down-Down	Tetratricopeptide repeat-like superfamily protein
	bra-miR5654b	#NAME?	DOWN	BnaA09g47950D	-1.34587	DOWN	Down-Down	Pentatricopeptide repeat (PPR) superfamily protein
	bra-miR5654b	#NAME?	DOWN	BnaC08g44830D	1.13113	UP	Down-Up	Pentatricopeptide repeat (PPR) superfamily protein
	Samples_miRNA_465	Inf	UP	BnaC05g28680D	1.11379	UP	Up-Up	ATPases
MA	bra-miR9556-5p	Inf	UP	BnaC07g46780D	1.33985	UP	Up-Up	xyloglucan endotransglucosylase/hydrolase
	hvu-miR156b	Inf	DOWN	BnaCnng61400D	1.26329	UP	Down-Up	Squamosa promoter-binding protein-like
	hvu-miR156b	Inf	DOWN	BnaA08g02670D	1.41074	UP	Down-Up	unknown protein
	hvu-miR156b	Inf	DOWN	BnaC06g16200D	1.32818	UP	Down-Up	squamosa promoter binding protein-like
	Samples_miRNA_28	#NAME?	DOWN	BnaC01g42830D	5.0078	UP	Down-Up	LOB domain-containing protein
	Samples_miRNA_28	#NAME?	DOWN	BnaC04g35020D	2.39964	UP	Down-Up	Golgi-body localisation protein
	Samples_miRNA_28	#NAME?	DOWN	BnaA04g12980D	1.79962	UP	Down-Up	Golgi-body localisation protein
	Samples_miRNA_28	#NAME?	DOWN	BnaA06g09650D	1.31878	UP	Down-Up	nudix hydrolase homolog
	Samples_miRNA_28	#NAME?	DOWN	BnaCnng41280D	4.43386	UP	Down-Up	TPX2 protein family
	bra-miR5654b	#NAME?	DOWN	BnaA09g47950D	1.353	UP	Down-Up	Pentatricopeptide repeat (PPR) superfamily protein
	bra-miR9556-5p	Inf	UP	BnaC07g46780D	1.33985	UP	Up-Up	xyloglucan endotransglucosylase/hydrolase
	bra-miR9556-5p	Inf	UP	BnaA09g35860D	1.03012	UP	Up-Up	unknown protein
	Samples_miRNA_7	Inf	UP	BnaA08g15180D	1.61433	UP	Up-Up	Disease resistance protein
LA	bra-miR5654b	#NAME?	DOWN	BnaC08g15720D	1.14018	UP	Down-Up	embryo defective 1586
	bra-miR5654b	#NAME?	DOWN	BnaC08g39680D	-1.19226	DOWN	Down-Down	Tetratricopeptide repeat-like superfamily protein
	bra-miR5654b	#NAME?	DOWN	BnaA09g46700D	1.29909	UP	Down-Up	Pentatricopeptide repeat (PPR) superfamily protein
	bra-miR5654b	#NAME?	DOWN	BnaA09g47950D	1.10515	UP	Down-Up	Pentatricopeptide repeat (PPR) superfamily protein
	bra-miR5654b	#NAME?	DOWN	BnaC08g44830D	-1.44461	DOWN	Down-Down	Pentatricopeptide repeat (PPR) superfamily protein
	bra-miR5654b	#NAME?	DOWN	BnaC02g04840D	1.03326	UP	Down-Up	unknown protein
	bra-miR164c-5p	#NAME?	DOWN	BnaC03g70990D	6.72602	UP	Down-Up	NAC domain containing protein
	Samples_miRNA_520	Inf	UP	BnaC02g08450D	2.03463	UP	Up-Up	isopentenyltransferase
	Samples_miRNA_520	Inf	UP	BnaAnng08610D	1.84076	UP	Up-Up	isopentenyltransferase
	Samples_miRNA_520	Inf	UP	BnaC02g18220D	2.23113	UP	Up-Up	isopentenyltransferase
	Samples_miRNA_520	Inf	UP	BnaA02g13860D	2.96188	UP	Up-Up	isopentenyltransferase
	Samples_miRNA_520	Inf	UP	BnaC08g02600D	1.06351	UP	Up-Up	unknown protein
	Samples_miRNA_520	Inf	UP	BnaA10g25510D	2.55779	UP	Up-Up	Pentatricopeptide repeat (PPR) superfamily protein
	Samples_miRNA_520	Inf	UP	BnaC01g03560D	1.31324	UP	Up-Up	P-loop containing nucleoside triphosphate hydrolases
	Samples_miRNA_520	Inf	UP	BnaA03g03020D	2.45445	UP	Up-Up	global transcription factor group E2
