# Supplementary material for: The initial deficiency of protein processing and flavonoids biosynthesis were the main mechanisms for the male sterility induced by SX-1 in Brassica napus
Source: BMC Genomics. 2018 Nov 7;19:806. doi: 10.1186/s12864-018-5203-y (PMC6223035; doi:10.1186/s12864-018-5203-y)
Supplement: Supplementary file 11 — The Log 2 ratio (CHA/control) of all the correlated DEGs and DEPs. r_SA, r_MA and r_LA result from RNA-seq at SA, MA and LA stage respectively. p_SA, p_MA and p_LA result from proteomic analysis respectively. (XLSX 37 kb) [file 12864_2018_5203_MOESM11_ESM.xlsx]

## Sheet: Sheet1
Additional file 11.The Log 2 ratio (CHA/CK) of all the correlated DEGs and DEPs.
Gene ID	Ath_ID	r_SA	p_SA	r_MA	p_MA	r_LA	p_LA	Anntation
BnaA02g20410D	AT1G01050.1	0.36	1.12096	4.05	4.02597	-3.65	-0.317367	pyrophosphorylase 1
BnaA09g51480D	AT1G01050.1	5.81	1.12096	5.16	4.02597	5.33	-0.317367	pyrophosphorylase 1
BnaA09g51600D	AT1G01050.1	0	1.12096	0	4.02597	-6.94	-0.317367	pyrophosphorylase 1
BnaA10g00790D	AT1G01050.1	0.35	1.12096	-0.05	4.02597	0.49	-0.317367	pyrophosphorylase 1
BnaC02g27940D	AT1G01050.1	0	1.12096	5.27	4.02597	-3.13	-0.317367	pyrophosphorylase 1
BnaC05g00850D	AT1G01050.1	0.07	1.12096	-0.19	4.02597	1.02	-0.317367	pyrophosphorylase 1
BnaC08g49780D	AT1G01050.1	-0.38	1.12096	-0.16	4.02597	-1.98	-0.317367	pyrophosphorylase 1
BnaCnng01560D	AT1G01050.1	1.31	1.12096	3.12	4.02597	-2.63	-0.317367	pyrophosphorylase 1
BnaA04g21720D	AT1G02050.1	-1.37	-0.627673	-0.97	-0.262991	-0.68	-8.10389	LESS ADHESIVE POLLEN 6
BnaC04g45570D	AT1G02050.1	-0.88	-0.627673	0.03	-0.262991	-0.51	-8.10389	LESS ADHESIVE POLLEN 6
BnaA06g08600D	AT1G04410.1	-0.07	0.944974	0.58	0.512584	0.65	0.520602	Lactate/malate dehydrogenase family protein
BnaA09g16400D	AT1G04410.1	-0.25	0.944974	0.14	0.512584	0.31	0.520602	Lactate/malate dehydrogenase family protein
BnaA10g02560D	AT1G04410.1	-0.52	0.944974	-0.37	0.512584	0.81	0.520602	Lactate/malate dehydrogenase family protein
BnaC05g02530D	AT1G04410.1	-0.52	0.944974	-0.29	0.512584	0.99	0.520602	Lactate/malate dehydrogenase family protein
BnaC09g17480D	AT1G04410.1	-0.28	0.944974	-0.09	0.512584	0.57	0.520602	Lactate/malate dehydrogenase family protein
BnaCnng55040D	AT1G04410.1	-0.11	0.944974	-0.6	0.512584	-0.22	0.520602	Lactate/malate dehydrogenase family protein
BnaA06g22170D	AT1G12270.1	0	2.26297	0	-1.51451	0	-2.32049	stress-inducible protein
BnaA09g47250D	AT1G12270.1	-6.22	2.26297	0.87	-1.51451	0	-2.32049	stress-inducible protein
BnaC05g17410D	AT1G12270.1	0	2.26297	0	-1.51451	0	-2.32049	stress-inducible protein
BnaC08g41350D	AT1G12270.1	-4.28	2.26297	0.32	-1.51451	-0.04	-2.32049	stress-inducible protein
BnaC09g32170D	AT1G12270.1	0	2.26297	0	-1.51451	0	-2.32049	stress-inducible protein
BnaUnng00430D	AT1G12270.1	0	2.26297	0	-1.51451	0	-2.32049	stress-inducible protein
BnaA06g10320D	AT1G15670.1	0	-8.68098	0	0	4.06	2.17165	Galactose oxidase/kelch repeat superfamily protein
BnaA09g56660D	AT1G15670.1	0	-8.68098	0	0	5.16	2.17165	Galactose oxidase/kelch repeat superfamily protein
BnaC05g49760D	AT1G15670.1	-0.02	-8.68098	0.08	0	4.78	2.17165	Galactose oxidase/kelch repeat superfamily protein
BnaCnng64790D	AT1G15670.1	-0.55	-8.68098	0.61	0	1.36	2.17165	Galactose oxidase/kelch repeat superfamily protein
BnaA07g10560D	AT1G22300.2	0.53	1.73651	0.19	-0.881598	-0.18	-1.25966	general regulatory factor 10
BnaAnng29600D	AT1G22300.2	-0.08	1.73651	0.43	-0.881598	0.97	-1.25966	general regulatory factor 10
BnaC04g02240D	AT1G22300.1	0	1.73651	0.31	-0.881598	1.82	-1.25966	general regulatory factor 10
BnaC05g17440D	AT1G22300.2	0.13	1.73651	0.38	-0.881598	0.18	-1.25966	general regulatory factor 10
BnaC07g13820D	AT1G22300.2	0.23	1.73651	0.18	-0.881598	-0.04	-1.25966	general regulatory factor 10
BnaC08g05920D	AT1G22300.1	0.01	1.73651	0	-0.881598	0	-1.25966	general regulatory factor 10
BnaA07g09490D	AT1G26480.1	-0.58	0	1.72	-0.960941	-6.13	-2.55053	general regulatory factor 12
BnaA08g19740D	AT1G26480.1	0	0	3.31	-0.960941	-4.84	-2.55053	general regulatory factor 12
BnaA09g28950D	AT1G26480.1	0	0	4.2	-0.960941	-4.19	-2.55053	general regulatory factor 12
BnaC03g57490D	AT1G26480.1	0	0	2.15	-0.960941	-5.54	-2.55053	general regulatory factor 12
BnaC05g20320D	AT1G26480.1	-0.22	0	4.22	-0.960941	-4.87	-2.55053	general regulatory factor 12
BnaC07g12270D	AT1G26480.1	0.47	0	0.56	-0.960941	-5.56	-2.55053	general regulatory factor 12
BnaA08g19830D	AT1G26630.1	0	-0.683234	-0.33	2.86596	0.6	0	FUMONISIN B1-RESISTANT12
BnaA09g29060D	AT1G26630.1	0.48	-0.683234	-0.21	2.86596	0.73	0	FUMONISIN B1-RESISTANT12
BnaC03g57360D	AT1G26630.1	0.13	-0.683234	-0.26	2.86596	0.33	0	FUMONISIN B1-RESISTANT12
BnaC05g20200D	AT1G26630.1	0.27	-0.683234	-0.31	2.86596	0.14	0	FUMONISIN B1-RESISTANT12
BnaC07g12330D	AT1G26630.1	0.17	-0.683234	-0.44	2.86596	0.41	0	FUMONISIN B1-RESISTANT12
BnaA07g09330D	AT1G26820.1	1.74	10.6001	2.78	10.3719	2.32	-1.14166	ribonuclease 3
BnaC07g12500D	AT1G26820.1	1.9	10.6001	3.68	10.3719	1.97	-1.14166	ribonuclease 3
BnaA04g20150D	AT1G29930.1	-0.18	-0.487163	0.65	-1.10575	1.01	-0.604493	chlorophyll A/B binding protein 1
BnaA07g07560D	AT1G29930.1	0.8	-0.487163	0.43	-1.10575	0.93	-0.604493	chlorophyll A/B binding protein 1
BnaA07g07570D	AT1G29930.1	0.75	-0.487163	1.17	-1.10575	0.28	-0.604493	chlorophyll A/B binding protein 1
BnaA08g17660D	AT1G29930.1	0.56	-0.487163	0.77	-1.10575	1.3	-0.604493	chlorophyll A/B binding protein 1
BnaA09g26570D	AT1G29930.1	0.34	-0.487163	0.68	-1.10575	1.37	-0.604493	chlorophyll A/B binding protein 1
BnaAnng22920D	AT1G29930.1	-0.13	-0.487163	1.37	-1.10575	1.43	-0.604493	chlorophyll A/B binding protein 1
BnaC03g59520D	AT1G29930.1	0.6	-0.487163	0.28	-1.10575	1.66	-0.604493	chlorophyll A/B binding protein 1
BnaC05g22880D	AT1G29930.1	0.07	-0.487163	0.63	-1.10575	1.14	-0.604493	chlorophyll A/B binding protein 1
BnaC07g09400D	AT1G29930.1	5.52	-0.487163	0	-1.10575	0	-0.604493	chlorophyll A/B binding protein 1
BnaA08g06260D	AT1G35720.1	0.68	-0.338136	0.77	4.39906	2.74	0.62991	annexin 1
BnaAnng04520D	AT1G35720.1	0.53	-0.338136	0.24	4.39906	0.69	0.62991	annexin 1
BnaC05g27530D	AT1G35720.1	0.46	-0.338136	0.04	4.39906	0.43	0.62991	annexin 1
BnaC06g08410D	AT1G35720.1	0.49	-0.338136	0.29	4.39906	-2.14	0.62991	annexin 1
BnaC08g06690D	AT1G35720.1	0.64	-0.338136	1.03	4.39906	2.29	0.62991	annexin 1
BnaA05g14590D	AT1G53240.1	-0.56	-0.660218	0.27	2.53119	-0.88	-0.923355	Lactate/malate dehydrogenase family protein
BnaA06g01050D	AT1G53240.1	-0.31	-0.660218	-0.06	2.53119	-0.05	-0.923355	Lactate/malate dehydrogenase family protein
BnaA08g01250D	AT1G53240.1	-0.39	-0.660218	0.26	2.53119	-0.79	-0.923355	Lactate/malate dehydrogenase family protein
BnaC03g78200D	AT1G53240.1	-0.08	-0.660218	-0.05	2.53119	-0.54	-0.923355	Lactate/malate dehydrogenase family protein
BnaC06g06220D	AT1G53240.1	-0.19	-0.660218	-0.01	2.53119	-0.17	-0.923355	Lactate/malate dehydrogenase family protein
BnaCnng29310D	AT1G53240.1	0	-0.660218	0	2.53119	0	-0.923355	Lactate/malate dehydrogenase family protein
BnaCnng29330D	AT1G53240.1	-0.43	-0.660218	0.42	2.53119	-0.76	-0.923355	Lactate/malate dehydrogenase family protein
BnaA06g01320D	AT1G54100.2	0	1.44141	0	2.19333	0	-3.33082	aldehyde dehydrogenase 7B4
BnaA08g00900D	AT1G54100.2	0.07	1.44141	0.04	2.19333	2.91	-3.33082	aldehyde dehydrogenase 7B4
BnaC03g78230D	AT1G54100.2	0.62	1.44141	-0.19	2.19333	2.3	-3.33082	aldehyde dehydrogenase 7B4
BnaC06g06890D	AT1G54100.2	0	1.44141	0	2.19333	0	-3.33082	aldehyde dehydrogenase 7B4
BnaA08g00430D	AT1G55510.1	0.02	-2.17483	0	-10.8796	1.66	-0.35704	branched-chain alpha-keto acid decarboxylase E1 beta subunit
BnaC03g70580D	AT1G55510.1	-0.4	-2.17483	0.14	-10.8796	1.46	-0.35704	branched-chain alpha-keto acid decarboxylase E1 beta subunit
BnaA02g31570D	AT1G56070.1	0.28	-2.74606	-0.8	0.700783	0.11	-1.56958	LOW EXPRESSION OF OSMOTICALLY RESPONSIVE GENES 1
BnaA02g31580D	AT1G56070.1	0.11	-2.74606	-0.28	0.700783	0.17	-1.56958	LOW EXPRESSION OF OSMOTICALLY RESPONSIVE GENES 1
BnaA04g20940D	AT1G56070.1	-0.02	-2.74606	-0.38	0.700783	0.23	-1.56958	LOW EXPRESSION OF OSMOTICALLY RESPONSIVE GENES 1
BnaA08g17430D	AT1G56070.1	-0.02	-2.74606	-0.32	0.700783	0.11	-1.56958	LOW EXPRESSION OF OSMOTICALLY RESPONSIVE GENES 1
BnaAnng33970D	AT1G56070.1	0.11	-2.74606	-0.22	0.700783	0.23	-1.56958	LOW EXPRESSION OF OSMOTICALLY RESPONSIVE GENES 1
BnaC02g40230D	AT1G56070.1	1.46	-2.74606	0.54	0.700783	-0.68	-1.56958	LOW EXPRESSION OF OSMOTICALLY RESPONSIVE GENES 1
BnaC02g40260D	AT1G56070.1	-0.08	-2.74606	-0.34	0.700783	-0.07	-1.56958	LOW EXPRESSION OF OSMOTICALLY RESPONSIVE GENES 1
BnaC03g76140D	AT1G56070.1	0.32	-2.74606	-0.39	0.700783	0.72	-1.56958	LOW EXPRESSION OF OSMOTICALLY RESPONSIVE GENES 1
BnaC03g76150D	AT1G56070.1	0.04	-2.74606	-0.5	0.700783	0.22	-1.56958	LOW EXPRESSION OF OSMOTICALLY RESPONSIVE GENES 1
BnaC04g44940D	AT1G56070.1	0.16	-2.74606	-0.13	0.700783	0.63	-1.56958	LOW EXPRESSION OF OSMOTICALLY RESPONSIVE GENES 1
BnaC04g44950D	AT1G56070.1	0.06	-2.74606	-0.61	0.700783	0.3	-1.56958	LOW EXPRESSION OF OSMOTICALLY RESPONSIVE GENES 1
BnaCnng26590D	AT1G56070.1	-0.74	-2.74606	0.03	0.700783	-0.94	-1.56958	LOW EXPRESSION OF OSMOTICALLY RESPONSIVE GENES 1
BnaA03g59200D	AT1G56360.1	1.23	-0.710547	-1.07	-7.70467	3.02	2.70657	purple acid phosphatase 6
BnaA08g15210D	AT1G56360.1	0.91	-0.710547	-0.26	-7.70467	-0.61	2.70657	purple acid phosphatase 6
BnaC03g61960D	AT1G56360.1	0.56	-0.710547	-0.75	-7.70467	-0.87	2.70657	purple acid phosphatase 6
BnaC07g51090D	AT1G56360.1	0.8	-0.710547	-1.46	-7.70467	2.42	2.70657	purple acid phosphatase 6
BnaC09g09650D	AT1G56360.1	1.32	-0.710547	-1.09	-7.70467	2.06	2.70657	purple acid phosphatase 6
BnaA01g22670D	AT1G61520.3	-0.21	-2.72044	0.5	1.61054	1.83	0.693041	photosystem I light harvesting complex gene 3
BnaA03g60230D	AT1G61520.3	0.12	-2.72044	1.02	1.61054	2.08	0.693041	photosystem I light harvesting complex gene 3
BnaA09g13710D	AT1G61520.3	-0.3	-2.72044	0.2	1.61054	1.67	0.693041	photosystem I light harvesting complex gene 3
BnaC01g29520D	AT1G61520.3	-0.3	-2.72044	0.23	1.61054	2.07	0.693041	photosystem I light harvesting complex gene 3
BnaCnng04230D	AT1G61520.3	0.18	-2.72044	0.76	1.61054	1.15	0.693041	photosystem I light harvesting complex gene 3
BnaCnng31870D	AT1G61520.3	-0.36	-2.72044	0.24	1.61054	1.31	0.693041	photosystem I light harvesting complex gene 3
BnaA09g10630D	AT1G62740.1	-0.48	1.39563	0.15	-0.246812	1.56	-1.26882	stress-inducible protein
BnaA09g12780D	AT1G62740.1	-0.29	1.39563	0.03	-0.246812	1.34	-1.26882	stress-inducible protein
BnaC04g19260D	AT1G62740.1	-0.41	1.39563	1.02	-0.246812	-1.39	-1.26882	stress-inducible protein
BnaC09g10920D	AT1G62740.1	-0.34	1.39563	-0.05	-0.246812	0.96	-1.26882	stress-inducible protein
BnaC09g13120D	AT1G62740.1	-0.1	1.39563	0.29	-0.246812	1.46	-1.26882	stress-inducible protein
BnaA06g03960D	AT1G63770.5	0.18	-1.0575	-0.03	0.596056	0.92	0.244733	Peptidase M1 family protein
BnaA06g39060D	AT1G63770.3	0.12	-1.0575	-0.14	0.596056	0.84	0.244733	Peptidase M1 family protein
BnaAnng17620D	AT1G63770.4	0	-1.0575	0	0.596056	0	0.244733	Peptidase M1 family protein
BnaC04g20490D	AT1G63770.5	0.26	-1.0575	-0.13	0.596056	2.21	0.244733	Peptidase M1 family protein
BnaC06g01820D	AT1G63770.5	0.2	-1.0575	0.29	0.596056	1.23	0.244733	Peptidase M1 family protein
BnaA02g13460D	AT1G67980.1	0	-8.39071	0	-10.8167	0	-9.90664	caffeoyl-CoA 3-O-methyltransferase
BnaA02g13470D	AT1G67980.1	1.5	-8.39071	-0.8	-10.8167	2.48	-9.90664	caffeoyl-CoA 3-O-methyltransferase
BnaA07g26750D	AT1G67980.1	-0.47	-8.39071	3.03	-10.8167	-5.19	-9.90664	caffeoyl-CoA 3-O-methyltransferase
BnaC02g17730D	AT1G67980.1	0	-8.39071	0	-10.8167	0	-9.90664	caffeoyl-CoA 3-O-methyltransferase
BnaC06g29150D	AT1G67980.1	0	-8.39071	2.62	-10.8167	-4.44	-9.90664	caffeoyl-CoA 3-O-methyltransferase
BnaA02g17100D	AT1G75030.1	0.46	-2.29921	-0.98	-1.52674	-4.04	2.26468	thaumatin-like protein 3
BnaA07g21910D	AT1G75030.1	0	-2.29921	0	-1.52674	0	2.26468	thaumatin-like protein 3
BnaAnng19340D	AT1G75030.1	-0.83	-2.29921	0.25	-1.52674	-3.66	2.26468	thaumatin-like protein 3
BnaC06g22620D	AT1G75030.1	0	-2.29921	0	-1.52674	0	2.26468	thaumatin-like protein 3
BnaC06g35840D	AT1G75030.1	-1.35	-2.29921	0.63	-1.52674	-0.93	2.26468	thaumatin-like protein 3
BnaCnng08170D	AT1G75030.1	1.44	-2.29921	-0.94	-1.52674	-2.08	2.26468	thaumatin-like protein 3
BnaA02g17600D	AT1G75940.1	1.92	-0.067472	-0.4	0.0544149	2.65	-2.45811	ATA27
BnaA02g17610D	AT1G75940.1	0.19	-0.067472	-0.68	0.0544149	0	-2.45811	ATA27
BnaC02g23330D	AT1G75940.1	1.68	-0.067472	-0.24	0.0544149	0.98	-2.45811	ATA27
BnaA07g11590D	AT1G76030.1	-0.84	-1.32481	-0.04	-0.301038	-0.71	-2.48564	ATPase, V1 complex, subunit B protein
BnaA07g32270D	AT1G76030.1	-0.21	-1.32481	-0.44	-0.301038	-0.51	-2.48564	ATPase, V1 complex, subunit B protein
BnaC05g34480D	AT1G76030.1	0	-1.32481	0	-0.301038	0	-2.48564	ATPase, V1 complex, subunit B protein
BnaC06g36660D	AT1G76030.1	0.41	-1.32481	0.4	-0.301038	0.46	-2.48564	ATPase, V1 complex, subunit B protein
BnaA04g03290D	AT1G79920.1	0.03	0.426208	0.15	0.0099277	0.65	-0.68153	Heat shock protein 70
BnaA06g00870D	AT1G79920.1	-0.26	0.426208	-0.01	0.0099277	1.2	-0.68153	Heat shock protein 70
BnaC01g36830D	AT1G79920.2	-0.18	0.426208	0.1	0.0099277	0	-0.68153	Heat shock protein 70
BnaC01g36860D	AT1G79920.2	0	0.426208	0	0.0099277	0	-0.68153	Heat shock protein 70
BnaC04g25190D	AT1G79920.1	0.02	0.426208	0.13	0.0099277	0.7	-0.68153	Heat shock protein 70
BnaC06g06400D	AT1G79920.1	-0.16	0.426208	0.04	0.0099277	0.88	-0.68153	Heat shock protein 70
BnaA03g38100D	AT2G05710.1	-0.02	-0.0378066	0.14	-7.91769	0.39	-0.480227	aconitase 3
BnaA06g07200D	AT2G05710.1	0.33	-0.0378066	0.15	-7.91769	0.98	-0.480227	aconitase 3
BnaAnng14360D	AT2G05710.1	0	-0.0378066	0	-7.91769	0	-0.480227	aconitase 3
BnaC03g74450D	AT2G05710.1	-0.04	-0.0378066	-0.05	-7.91769	0.25	-0.480227	aconitase 3
BnaC07g04160D	AT2G05710.1	0	-0.0378066	1.15	-7.91769	2.03	-0.480227	aconitase 3
BnaAnng22360D	AT2G19070.1	1.03	1.30507	-0.59	-0.226898	0.83	0.226549	spermidine hydroxycinnamoyl transferase
BnaC09g09810D	AT2G19070.1	2.5	1.30507	-0.58	-0.226898	1.25	0.226549	spermidine hydroxycinnamoyl transferase
BnaCnng30570D	AT2G19070.1	1.6	1.30507	-0.27	-0.226898	1.25	0.226549	spermidine hydroxycinnamoyl transferase
BnaCnng39330D	AT2G19070.1	1.47	1.30507	-0.29	-0.226898	1.54	0.226549	spermidine hydroxycinnamoyl transferase
BnaA03g14140D	AT2G30860.1	0.8	-0.722014	0.4	1.84718	1.12	0.839917	glutathione S-transferase PHI 9
BnaA04g17910D	AT2G30860.1	0.19	-0.722014	0.22	1.84718	1.51	0.839917	glutathione S-transferase PHI 9
BnaC03g17110D	AT2G30860.1	-0.14	-0.722014	0.45	1.84718	1.07	0.839917	glutathione S-transferase PHI 9
BnaC04g41510D	AT2G30860.1	0.19	-0.722014	0.72	1.84718	1.19	0.839917	glutathione S-transferase PHI 9
BnaA03g16860D	AT2G36880.2	-0.53	-1.58358	0.38	-1.44871	-1.91	-0.570876	methionine adenosyltransferase 3
BnaA05g07530D	AT2G36880.2	0.49	-1.58358	0.08	-1.44871	-1.08	-0.570876	methionine adenosyltransferase 3
BnaC03g20310D	AT2G36880.2	0.56	-1.58358	1.13	-1.44871	-2.77	-0.570876	methionine adenosyltransferase 3
BnaC04g08360D	AT2G36880.2	0.33	-1.58358	-0.15	-1.44871	-0.62	-0.570876	methionine adenosyltransferase 3
BnaA02g28950D	AT2G46290.1	-0.21	-2.39416	0.09	-11.4603	0.34	-2.04861	Transducin/WD40 repeat-like superfamily protein
BnaA06g32100D	AT2G46290.1	-0.08	-2.39416	-0.19	-11.4603	0.09	-2.04861	Transducin/WD40 repeat-like superfamily protein
BnaAnng38210D	AT2G46290.1	-0.18	-2.39416	-0.18	-11.4603	-0.16	-2.04861	Transducin/WD40 repeat-like superfamily protein
BnaC02g36850D	AT2G46290.1	-0.15	-2.39416	-0.03	-11.4603	-0.03	-2.04861	Transducin/WD40 repeat-like superfamily protein
BnaA03g21800D	AT2G47470.1	-0.46	2.00286	-0.51	-1.58761	-0.52	0.919304	UNFERTILIZED EMBRYO SAC 5
BnaA05g00500D	AT2G47470.1	-0.48	2.00286	-0.8	-1.58761	-1.05	0.919304	UNFERTILIZED EMBRYO SAC 5
BnaC03g26070D	AT2G47470.1	-0.67	2.00286	-0.63	-1.58761	-0.86	0.919304	UNFERTILIZED EMBRYO SAC 5
BnaC04g27450D	AT2G47470.1	-0.16	2.00286	1.43	-1.58761	1.16	0.919304	UNFERTILIZED EMBRYO SAC 5
BnaC04g51940D	AT2G47470.1	-0.27	2.00286	-0.75	-1.58761	-1.88	0.919304	UNFERTILIZED EMBRYO SAC 5
BnaA01g34430D	AT3G03250.1	-0.21	-11.9062	-0.01	0	-1.73	-1.02873	UDP-GLUCOSE PYROPHOSPHORYLASE 1
BnaA05g32480D	AT3G03250.1	-0.24	-11.9062	-0.05	0	-0.92	-1.02873	UDP-GLUCOSE PYROPHOSPHORYLASE 1
BnaAnng25620D	AT3G03250.1	-0.31	-11.9062	0.17	0	-0.55	-1.02873	UDP-GLUCOSE PYROPHOSPHORYLASE 1
BnaCnng18460D	AT3G03250.1	0	-11.9062	0	0	0	-1.02873	UDP-GLUCOSE PYROPHOSPHORYLASE 1
BnaCnng53900D	AT3G03250.1	-0.23	-11.9062	-0.51	0	-0.35	-1.02873	UDP-GLUCOSE PYROPHOSPHORYLASE 1
BnaA01g32030D	AT3G09840.1	-0.18	-4	-0.43	-6.42541	0.7	1.5456	cell division cycle 48
BnaA03g30510D	AT3G09840.1	0.08	-4	-0.32	-6.42541	0.86	1.5456	cell division cycle 48
BnaA05g28710D	AT3G09840.1	-0.2	-4	-0.54	-6.42541	1.16	1.5456	cell division cycle 48
BnaC01g24420D	AT3G09840.1	0	-4	0	-6.42541	0	1.5456	cell division cycle 48
BnaC01g38940D	AT3G09840.1	-0.1	-4	-0.17	-6.42541	0.84	1.5456	cell division cycle 48
BnaC03g35820D	AT3G09840.1	0.01	-4	-0.15	-6.42541	0.84	1.5456	cell division cycle 48
BnaC04g10040D	AT3G09840.1	1.55	-4	1.93	-6.42541	1.73	1.5456	cell division cycle 48
BnaC05g23240D	AT3G09840.1	0	-4	0	-6.42541	0	1.5456	cell division cycle 48
BnaC05g43180D	AT3G09840.1	-0.39	-4	-0.31	-6.42541	1	1.5456	cell division cycle 48
BnaC08g22050D	AT3G09840.1	0	-4	0	-6.42541	0	1.5456	cell division cycle 48
BnaA03g31200D	AT3G10410.1	0.64	-0.352576	0.12	4.02597	1.1	-0.196685	SERINE CARBOXYPEPTIDASE-LIKE 49
BnaA05g28410D	AT3G10410.1	-0.66	-0.352576	0.88	4.02597	1.4	-0.196685	SERINE CARBOXYPEPTIDASE-LIKE 49
BnaC01g38630D	AT3G10410.1	0.33	-0.352576	0.41	4.02597	-0.67	-0.196685	SERINE CARBOXYPEPTIDASE-LIKE 49
BnaC03g36530D	AT3G10410.1	0.37	-0.352576	0.08	4.02597	1.28	-0.196685	SERINE CARBOXYPEPTIDASE-LIKE 49
BnaC05g42700D	AT3G10410.1	-0.81	-0.352576	0.77	4.02597	1.66	-0.196685	SERINE CARBOXYPEPTIDASE-LIKE 49
BnaA01g31350D	AT3G10920.1	0.5	-8.44389	0.58	-8.61757	0.57	-10.9508	manganese superoxide dismutase 1
BnaA05g28000D	AT3G10920.1	-0.39	-8.44389	0.26	-8.61757	1	-10.9508	manganese superoxide dismutase 1
BnaA05g28020D	AT3G10920.1	0	-8.44389	0	-8.61757	0	-10.9508	manganese superoxide dismutase 1
BnaC05g42240D	AT3G10920.1	-0.35	-8.44389	0.22	-8.61757	0.41	-10.9508	manganese superoxide dismutase 1
BnaA05g26910D	AT3G12110.1	-0.73	0.0547736	0	-0.0537648	0.01	-1.83254	actin-11
BnaA04g24300D	AT3G12110.1	0	0.0547736	0	-0.0537648	0	-1.83254	actin-11
BnaC03g59550D	AT3G12110.1	0	0.0547736	0	-0.0537648	0	-1.83254	actin-11
BnaC04g48100D	AT3G12110.1	0	0.0547736	0	-0.0537648	0	-1.83254	actin-11
BnaC05g34300D	AT3G12110.1	-0.22	0.0547736	-0.16	-0.0537648	1.22	-1.83254	actin-11
BnaC05g40980D	AT3G12110.1	-1.08	0.0547736	3.12	-0.0537648	1.37	-1.83254	actin-11
BnaA03g34780D	AT3G17820.1	0.14	-0.66699	-0.23	-0.40687	-1.85	-1.37578	glutamine synthetase 1.3
BnaA05g22420D	AT3G17820.1	0.03	-0.66699	-0.19	-0.40687	2.06	-1.37578	glutamine synthetase 1.3
BnaA09g27570D	AT3G17820.1	0	-0.66699	0	-0.40687	0	-1.37578	glutamine synthetase 1.3
BnaA09g27970D	AT3G17820.1	0	-0.66699	0	-0.40687	0	-1.37578	glutamine synthetase 1.3
BnaAnng27730D	AT3G17820.1	0.13	-0.66699	0.27	-0.40687	-2.06	-1.37578	glutamine synthetase 1.3
BnaC03g40250D	AT3G17820.1	-0.02	-0.66699	-0.15	-0.40687	-1.52	-1.37578	glutamine synthetase 1.3
BnaC05g35690D	AT3G17820.1	-0.48	-0.66699	0.15	-0.40687	0.31	-1.37578	glutamine synthetase 1.3
BnaC05g39460D	AT3G17820.1	0	-0.66699	0	-0.40687	0	-1.37578	glutamine synthetase 1.3
BnaCnng57900D	AT3G17820.1	0.27	-0.66699	0.23	-0.40687	-2.36	-1.37578	glutamine synthetase 1.3
BnaA01g23670D	AT3G42960.1	-0.11	-11.0807	0.1	-11.4444	-0.32	-10.8131	TAPETUM 1
BnaA06g18620D	AT3G45010.1	-0.2	-0.113969	2.68	-1.68251	0.66	-3.66248	serine carboxypeptidase-like 48
BnaC03g55150D	AT3G45010.1	0.81	-0.113969	0.54	-1.68251	0.64	-3.66248	serine carboxypeptidase-like 48
BnaA01g19850D	AT3G46520.1	0.09	0	2.89	0	-2.79	-1.72227	actin-12
BnaA02g07080D	AT3G46520.1	0.13	0	3.27	0	-3.4	-1.72227	actin-12
BnaA03g09510D	AT3G46520.1	0	0	3.91	0	-3.42	-1.72227	actin-12
BnaA06g18020D	AT3G46520.1	0	0	1.92	0	-3.7	-1.72227	actin-12
BnaA06g20460D	AT3G46520.1	0	0	2.74	0	-4.34	-1.72227	actin-12
BnaA10g12390D	AT3G46520.1	-0.23	0	0.76	0	-1.98	-1.72227	actin-12
BnaC02g10000D	AT3G46520.1	0	0	2.05	0	-3.21	-1.72227	actin-12
BnaC03g12030D	AT3G46520.1	0	0	3.79	0	-3.38	-1.72227	actin-12
BnaC03g55960D	AT3G46520.1	0	0	2.12	0	-5.45	-1.72227	actin-12
BnaC03g75050D	AT3G46520.1	0	0	1.38	0	-4.88	-1.72227	actin-12
BnaC09g34680D	AT3G46520.1	-0.06	0	0.28	0	-1.63	-1.72227	actin-12
BnaA01g20450D	AT3G48690.1	-2.72	-0.205251	0.02	1.1411	-0.62	-1.71141	CXE12
BnaA06g19010D	AT3G48690.1	-1.04	-0.205251	0.46	1.1411	3.23	-1.71141	CXE12
BnaC01g25640D	AT3G48690.1	-1.89	-0.205251	-0.15	1.1411	-0.98	-1.71141	CXE12
BnaA01g19750D	AT3G50820.1	-0.28	0.437771	0.38	-12.4162	3.98	0.419809	photosystem II subunit O-2
BnaC01g23800D	AT3G50820.1	-0.34	0.437771	0.32	-12.4162	4.28	0.419809	photosystem II subunit O-2
BnaC07g46350D	AT3G50820.1	0	0.437771	0	-12.4162	0	0.419809	photosystem II subunit O-2
BnaC08g22200D	AT3G50820.1	0	0.437771	-0.41	-12.4162	2.93	0.419809	photosystem II subunit O-2
BnaA01g19710D	AT3G51000.1	-0.17	-1.62215	0.79	-2.22199	0.41	0.00804558	alpha/beta-Hydrolases superfamily protein
BnaA03g41090D	AT3G51000.1	0.73	-1.62215	-0.12	-2.22199	0.13	0.00804558	alpha/beta-Hydrolases superfamily protein
BnaA09g31660D	AT3G51000.1	0	-1.62215	1.7	-2.22199	-0.16	0.00804558	alpha/beta-Hydrolases superfamily protein
BnaC01g23690D	AT3G51000.1	0.14	-1.62215	0.78	-2.22199	2.63	0.00804558	alpha/beta-Hydrolases superfamily protein
BnaC07g32000D	AT3G51000.1	0.34	-1.62215	-0.01	-2.22199	-1.15	0.00804558	alpha/beta-Hydrolases superfamily protein
BnaC08g22490D	AT3G51000.1	0	-1.62215	0	-2.22199	0	0.00804558	alpha/beta-Hydrolases superfamily protein
BnaA04g01120D	AT3G60750.1	0.38	1.53533	-0.26	-1.4841	0.6	-1.01815	Transketolase
BnaA07g18800D	AT3G60750.1	0	1.53533	0	-1.4841	0	-1.01815	Transketolase
BnaA09g38720D	AT3G60750.1	-0.55	1.53533	-0.12	-1.4841	0.88	-1.01815	Transketolase
BnaC04g22010D	AT3G60750.1	0.23	1.53533	-0.19	-1.4841	0.62	-1.01815	Transketolase
BnaC05g15760D	AT3G60750.1	-0.51	1.53533	0.56	-1.4841	0.76	-1.01815	Transketolase
BnaC08g30890D	AT3G60750.1	-0.18	1.53533	0.09	-1.4841	0.89	-1.01815	Transketolase
BnaCnng31080D	AT3G60750.2	-0.39	1.53533	0.17	-1.4841	0.26	-1.01815	Transketolase
BnaCnng31120D	AT3G60750.1	0	1.53533	0	-1.4841	0	-1.01815	Transketolase
BnaA03g22910D	AT4G00040.1	1.04	-2.34075	-0.25	0.271673	-4.84	-0.481492	Chalcone and stilbene synthase family protein
BnaC03g26980D	AT4G00040.1	0.82	-2.34075	0.08	0.271673	-4.24	-0.481492	Chalcone and stilbene synthase family protein
BnaA03g26530D	AT4G01850.2	-0.15	-3.10542	0.15	-1.27275	0.8	1.10235	S-adenosylmethionine synthetase 2
BnaA09g00390D	AT4G01850.2	-1.04	-3.10542	-0.55	-1.27275	-0.43	1.10235	S-adenosylmethionine synthetase 2
BnaC03g31390D	AT4G01850.2	-0.05	-3.10542	0.13	-1.27275	0.23	1.10235	S-adenosylmethionine synthetase 2
BnaCnng75920D	AT4G01850.2	0.3	-3.10542	0.68	-1.27275	0.42	1.10235	S-adenosylmethionine synthetase 2
BnaA03g25300D	AT4G04020.1	-0.22	2.71463	-0.13	-0.3595	1.39	0.505649	fibrillin
BnaA09g20620D	AT4G04020.1	0.33	2.71463	0.5	-0.3595	2.56	0.505649	fibrillin
BnaC03g29750D	AT4G04020.1	0.17	2.71463	0.1	-0.3595	0.99	0.505649	fibrillin
BnaC09g22960D	AT4G04020.1	0.64	2.71463	1.82	-0.3595	1.8	0.505649	fibrillin
BnaCnng74600D	AT4G04020.1	1.68	2.71463	0.9	-0.3595	2.17	0.505649	fibrillin
BnaA02g21580D	AT4G11820.2	1.22	2.51074	-0.6	-9.43669	0.38	-1.15699	MVA1
BnaA09g21330D	AT4G11820.2	0.17	2.51074	-0.1	-9.43669	-0.15	-1.15699	MVA1
BnaC09g23740D	AT4G11820.2	0.24	2.51074	-0.37	-9.43669	0.4	-1.15699	MVA1
BnaCnng23810D	AT4G11820.2	0	2.51074	0	-9.43669	0	-1.15699	MVA1
BnaCnng45000D	AT4G11820.2	0.5	2.51074	-0.87	-9.43669	-0.23	-1.15699	MVA1
BnaA04g06890D	AT4G13430.1	0.17	-2.89864	0.02	-8.81971	0.58	-8.2446	isopropyl malate isomerase large subunit 1
BnaA08g05070D	AT4G13430.1	0.31	-2.89864	-0.02	-8.81971	0.92	-8.2446	isopropyl malate isomerase large subunit 1
BnaC06g15430D	AT4G13430.1	0	-2.89864	0	-8.81971	0	-8.2446	isopropyl malate isomerase large subunit 1
BnaC08g47120D	AT4G13430.1	0.3	-2.89864	-0.04	-8.81971	0.3	-8.2446	isopropyl malate isomerase large subunit 1
BnaC09g05620D	AT4G13430.1	0.12	-2.89864	0.08	-8.81971	-0.14	-8.2446	isopropyl malate isomerase large subunit 1
BnaCnng15040D	AT4G13430.1	0.03	-2.89864	-0.13	-8.81971	0.71	-8.2446	isopropyl malate isomerase large subunit 1
BnaA04g06300D	AT4G14040.1	-0.85	-2.95431	0.73	-0.491172	5.19	-0.465987	selenium-binding protein 2
BnaA08g07560D	AT4G14040.1	0	-2.95431	0	-0.491172	0	-0.465987	selenium-binding protein 2
BnaA08g07580D	AT4G14040.1	-0.12	-2.95431	0.69	-0.491172	2.09	-0.465987	selenium-binding protein 2
BnaC04g29120D	AT4G14040.1	0.51	-2.95431	0.57	-0.491172	2.21	-0.465987	selenium-binding protein 2
BnaC08g08320D	AT4G14040.1	-0.24	-2.95431	0.31	-0.491172	1.57	-0.465987	selenium-binding protein 2
BnaUnng04320D	AT4G14040.1	0	-2.95431	0	-0.491172	0	-0.465987	selenium-binding protein 2
BnaA01g17140D	AT4G16660.1	0.05	-0.96371	-0.48	0.385713	1.75	-1.69719	heat shock protein 70
BnaA03g42810D	AT4G16660.1	-0.91	-0.96371	-0.75	0.385713	-0.89	-1.69719	heat shock protein 70
BnaC01g19960D	AT4G16660.1	-1	-0.96371	-0.65	0.385713	-1.31	-1.69719	heat shock protein 70
BnaC01g26070D	AT4G16660.1	-0.59	-0.96371	0	0.385713	0	-1.69719	heat shock protein 70
BnaC07g50110D	AT4G16660.1	-0.91	-0.96371	-0.78	0.385713	-0.44	-1.69719	heat shock protein 70
BnaA01g10800D	AT4G20890.1	-0.21	9.39911	0.01	-0.704649	-0.18	1.18623	tubulin beta-9 chain
BnaA03g44640D	AT4G20890.1	0.75	9.39911	0.37	-0.704649	1.53	1.18623	tubulin beta-9 chain
BnaA08g09560D	AT4G20890.1	-0.21	9.39911	0.26	-0.704649	-3.43	1.18623	tubulin beta-9 chain
BnaC01g12380D	AT4G20890.1	-0.25	9.39911	-0.01	-0.704649	0.29	1.18623	tubulin beta-9 chain
BnaC03g63960D	AT4G20890.1	0.71	9.39911	0.86	-0.704649	-1.74	1.18623	tubulin beta-9 chain
BnaC07g36480D	AT4G20890.1	0.38	9.39911	-0.12	-0.704649	-0.99	1.18623	tubulin beta-9 chain
BnaA01g12360D	AT4G22670.1	0.26	-8.29246	0.27	-7.42206	1.83	2.46854	HSP70-interacting protein 1
BnaA08g10410D	AT4G22670.1	0.51	-8.29246	0.14	-7.42206	1.14	2.46854	HSP70-interacting protein 1
BnaC01g14070D	AT4G22670.1	-0.25	-8.29246	-0.7	-7.42206	1.26	2.46854	HSP70-interacting protein 1
BnaC06g21470D	AT4G22670.1	0	-8.29246	0	-7.42206	0	2.46854	HSP70-interacting protein 1
BnaCnng72890D	AT4G22670.1	0.28	-8.29246	0.25	-7.42206	0.97	2.46854	HSP70-interacting protein 1
BnaA01g13390D	AT4G23730.1	-1.09	1.07588	0.04	2.27532	2.7	-0.380063	Galactose mutarotase-like superfamily protein
BnaA03g46210D	AT4G23730.1	-0.6	1.07588	-0.2	2.27532	0.89	-0.380063	Galactose mutarotase-like superfamily protein
BnaC01g15540D	AT4G23730.1	-1.04	1.07588	-0.2	2.27532	2.9	-0.380063	Galactose mutarotase-like superfamily protein
BnaC07g38460D	AT4G23730.1	-1.24	1.07588	1.11	2.27532	-0.78	-0.380063	Galactose mutarotase-like superfamily protein
BnaA01g13540D	AT4G23920.1	-0.25	-2.77864	0.28	-3.60836	1.93	-0.860352	UDP-D-glucose/UDP-D-galactose 4-epimerase 2
BnaC01g15760D	AT4G23920.1	0.25	-2.77864	0.36	-3.60836	1.59	-0.860352	UDP-D-glucose/UDP-D-galactose 4-epimerase 2
BnaC07g38610D	AT4G23920.1	0.89	-2.77864	0.06	-3.60836	2.61	-0.860352	UDP-D-glucose/UDP-D-galactose 4-epimerase 2
BnaA01g13670D	AT4G24190.1	-1.45	-4.35463	-0.79	-1.14979	-0.79	-0.125594	SHEPHERD
BnaA03g46510D	AT4G24190.1	0	-4.35463	-0.01	-1.14979	0.97	-0.125594	SHEPHERD
BnaA08g14800D	AT4G24190.1	0.19	-4.35463	4.89	-1.14979	-3.44	-0.125594	SHEPHERD
BnaC01g16050D	AT4G24190.1	-1.79	-4.35463	-0.91	-1.14979	-1.31	-0.125594	SHEPHERD
BnaC07g38780D	AT4G24190.1	-1.23	-4.35463	-0.88	-1.14979	-0.18	-0.125594	SHEPHERD
BnaC08g11400D	AT4G24190.1	-0.5	-4.35463	0	-1.14979	-1.99	-0.125594	SHEPHERD
BnaAnng11850D	AT4G27620.2	-0.31	-7.99871	0.44	-7.35191	-0.76	-5.63669	unknown protein
BnaC01g20210D	AT4G27620.2	0.63	-7.99871	0.28	-7.35191	0.3	-5.63669	unknown protein
BnaA01g05320D	AT4G39090.1	-0.42	-6.11894	0.25	-9.16785	3.45	-9.41477	RESPONSIVE TO DEHYDRATION 19
BnaA08g16740D	AT4G39090.1	-0.76	-6.11894	0.37	-9.16785	2.46	-9.41477	RESPONSIVE TO DEHYDRATION 19
BnaC01g00170D	AT4G39090.1	0.62	-6.11894	0.65	-9.16785	3	-9.41477	RESPONSIVE TO DEHYDRATION 19
BnaC04g47950D	AT4G39090.1	0	-6.11894	0	-9.16785	0	-9.41477	RESPONSIVE TO DEHYDRATION 19
BnaC07g09190D	AT4G39090.1	0.87	-6.11894	0.01	-9.16785	2.08	-9.41477	RESPONSIVE TO DEHYDRATION 19
BnaCnng71840D	AT4G39090.1	-0.46	-6.11894	-0.15	-9.16785	1.96	-9.41477	RESPONSIVE TO DEHYDRATION 19
BnaA08g16620D	AT4G39230.1	1.12	-8.75862	-0.28	3.33145	-1.88	-0.117539	NmrA-like negative transcriptional regulator family protein
BnaC03g60480D	AT4G39230.1	0.72	-8.75862	0.28	3.33145	-2.98	-0.117539	NmrA-like negative transcriptional regulator family protein
BnaA03g39320D	AT5G02500.2	-0.27	-7.70273	-0.26	-11.0102	1.48	-1.1862	heat shock cognate protein 70-1
BnaA03g59360D	AT5G02500.2	-0.89	-7.70273	0	-11.0102	0.22	-1.1862	heat shock cognate protein 70-1
BnaA06g03820D	AT5G02500.1	0	-7.70273	0	-11.0102	0	-1.1862	heat shock cognate protein 70-1
BnaA09g05850D	AT5G02500.1	0.05	-7.70273	0.19	-11.0102	0.6	-1.1862	heat shock cognate protein 70-1
BnaA09g05860D	AT5G02500.2	0.12	-7.70273	-0.19	-11.0102	0.75	-1.1862	heat shock cognate protein 70-1
BnaA09g29090D	AT5G02500.2	-0.35	-7.70273	-0.38	-11.0102	1.06	-1.1862	heat shock cognate protein 70-1
BnaA09g29100D	AT5G02500.1	0.51	-7.70273	1.4	-11.0102	2.04	-1.1862	heat shock cognate protein 70-1
BnaA10g27060D	AT5G02500.1	0.22	-7.70273	0.09	-11.0102	0.43	-1.1862	heat shock cognate protein 70-1
BnaA10g27070D	AT5G02500.2	0.6	-7.70273	-0.18	-11.0102	0.3	-1.1862	heat shock cognate protein 70-1
BnaA10g27080D	AT5G02500.1	1.6	-7.70273	-0.04	-11.0102	1.72	-1.1862	heat shock cognate protein 70-1
BnaAnng12060D	AT5G02500.1	0	-7.70273	0.42	-11.0102	0	-1.1862	heat shock cognate protein 70-1
BnaAnng12070D	AT5G02500.2	-0.93	-7.70273	0.46	-11.0102	2.38	-1.1862	heat shock cognate protein 70-1
BnaC01g27600D	AT5G02500.1	-0.32	-7.70273	1.09	-11.0102	2.28	-1.1862	heat shock cognate protein 70-1
BnaC02g31430D	AT5G02500.1	0	-7.70273	0	-11.0102	0	-1.1862	heat shock cognate protein 70-1
BnaC02g31440D	AT5G02500.1	0.32	-7.70273	1.48	-11.0102	0	-1.1862	heat shock cognate protein 70-1
BnaC03g46680D	AT5G02500.2	-0.2	-7.70273	-0.21	-11.0102	0.41	-1.1862	heat shock cognate protein 70-1
BnaC03g46690D	AT5G02500.1	0	-7.70273	0	-11.0102	0	-1.1862	heat shock cognate protein 70-1
BnaC03g48020D	AT5G02500.2	0	-7.70273	0	-11.0102	0	-1.1862	heat shock cognate protein 70-1
BnaC04g18270D	AT5G02500.2	0	-7.70273	2.71	-11.0102	0.79	-1.1862	heat shock cognate protein 70-1
BnaC04g18290D	AT5G02500.1	-1.37	-7.70273	1.7	-11.0102	2.43	-1.1862	heat shock cognate protein 70-1
BnaC04g42010D	AT5G02500.1	-0.2	-7.70273	0.31	-11.0102	0.15	-1.1862	heat shock cognate protein 70-1
BnaC04g42020D	AT5G02500.2	-0.2	-7.70273	-0.72	-11.0102	-0.03	-1.1862	heat shock cognate protein 70-1
BnaC05g20160D	AT5G02500.1	0.83	-7.70273	0.21	-11.0102	2.6	-1.1862	heat shock cognate protein 70-1
BnaC05g20170D	AT5G02500.2	-0.39	-7.70273	-0.15	-11.0102	0.83	-1.1862	heat shock cognate protein 70-1
BnaC06g01970D	AT5G02500.1	0.08	-7.70273	0	-11.0102	0.24	-1.1862	heat shock cognate protein 70-1
BnaC06g06790D	AT5G02500.2	0	-7.70273	0	-11.0102	0	-1.1862	heat shock cognate protein 70-1
BnaCnng03460D	AT5G02500.2	0.08	-7.70273	0.02	-11.0102	0.06	-1.1862	heat shock cognate protein 70-1
BnaCnng03470D	AT5G02500.1	0.05	-7.70273	0.27	-11.0102	0.13	-1.1862	heat shock cognate protein 70-1
BnaA03g00850D	AT5G03340.1	-0.78	-2.60178	0.22	-0.325347	1.39	-0.307444	ATPase, AAA-type, CDC48 protein
BnaC03g01160D	AT5G03340.1	-0.91	-2.60178	0.04	-0.325347	1.46	-0.307444	ATPase, AAA-type, CDC48 protein
BnaC05g18380D	AT5G03340.1	0.53	-2.60178	1.65	-0.325347	2.88	-0.307444	ATPase, AAA-type, CDC48 protein
BnaA03g00990D	AT5G03630.1	-0.02	-2.98658	0.21	-9.05267	0.79	1.45517	ATMDAR2
BnaA03g30460D	AT5G03630.1	0	-2.98658	0	-9.05267	0	1.45517	ATMDAR2
BnaC03g01350D	AT5G03630.1	0.46	-2.98658	0.72	-9.05267	1.21	1.45517	ATMDAR2
BnaC03g35780D	AT5G03630.1	0	-2.98658	0	-9.05267	0	1.45517	ATMDAR2
BnaA03g02520D	AT5G08540.1	-1.78	-2.7141	1.17	-10.6162	1	-3.42899	unknown protein
BnaA06g24390D	AT5G08540.1	0	-2.7141	0	-10.6162	0	-3.42899	unknown protein
BnaA10g22900D	AT5G08540.1	0.46	-2.7141	0.37	-10.6162	1.25	-3.42899	unknown protein
BnaC03g03650D	AT5G08540.1	0.72	-2.7141	0.06	-10.6162	2.33	-3.42899	unknown protein
BnaC09g47440D	AT5G08540.1	0.38	-2.7141	0.35	-10.6162	1.89	-3.42899	unknown protein
BnaA02g00740D	AT5G10860.1	-0.21	1.74378	0	-0.770929	1.63	0	Cystathionine beta-synthase
BnaA10g21510D	AT5G10860.1	-0.08	1.74378	0.23	-0.770929	-0.27	0	Cystathionine beta-synthase
BnaC02g00040D	AT5G10860.1	0.16	1.74378	0.34	-0.770929	1.54	0	Cystathionine beta-synthase
BnaC09g45610D	AT5G10860.1	0.1	1.74378	0.5	-0.770929	0.56	0	Cystathionine beta-synthase
BnaA05g09090D	AT5G12250.1	0.1	-1.47303	0.09	-9.89326	-0.34	-0.490556	beta-6 tubulin
BnaA10g20420D	AT5G12250.1	-0.46	-1.47303	0.49	-9.89326	-0.11	-0.490556	beta-6 tubulin
BnaC03g05430D	AT5G12250.1	0	-1.47303	0	-9.89326	0	-0.490556	beta-6 tubulin
BnaC09g44450D	AT5G12250.1	-0.36	-1.47303	0.13	-9.89326	-0.04	-0.490556	beta-6 tubulin
BnaA03g04300D	AT5G13370.1	0.37	-1.88399	0.48	-3.00331	2.29	1.28462	Auxin-responsive GH3 family protein
BnaA07g01920D	AT5G13370.1	1.5	-1.88399	0.25	-3.00331	-0.08	1.28462	Auxin-responsive GH3 family protein
BnaC02g04670D	AT5G13370.1	1.39	-1.88399	-0.42	-3.00331	8.16	1.28462	Auxin-responsive GH3 family protein
BnaC02g04680D	AT5G13370.1	0	-1.88399	0	-3.00331	0	1.28462	Auxin-responsive GH3 family protein
BnaC02g04690D	AT5G13370.1	0	-1.88399	0	-3.00331	0	1.28462	Auxin-responsive GH3 family protein
BnaA02g02610D	AT5G15450.1	0.24	-5.28068	-0.23	0	1.23	-2.16924	casein lytic proteinase B3
BnaA02g02620D	AT5G15450.1	0.24	-5.28068	-0.09	0	1.06	-2.16924	casein lytic proteinase B3
BnaA10g18730D	AT5G15450.1	0.37	-5.28068	-0.35	0	0.82	-2.16924	casein lytic proteinase B3
BnaC02g06060D	AT5G15450.1	0.29	-5.28068	0.01	0	0.39	-2.16924	casein lytic proteinase B3
BnaC09g42450D	AT5G15450.1	0.21	-5.28068	-0.08	0	1.51	-2.16924	casein lytic proteinase B3
BnaA02g02720D	AT5G15650.1	-0.59	-2.07209	-0.2	0	-1.78	3.97831	reversibly glycosylated polypeptide 2
BnaA03g05580D	AT5G15650.1	0.02	-2.07209	-0.48	0	-0.69	3.97831	reversibly glycosylated polypeptide 2
BnaA10g18590D	AT5G15650.1	-0.13	-2.07209	-0.24	0	-0.88	3.97831	reversibly glycosylated polypeptide 2
BnaC02g06160D	AT5G15650.1	-0.64	-2.07209	0.36	0	-1.54	3.97831	reversibly glycosylated polypeptide 2
BnaC03g07130D	AT5G15650.1	0.07	-2.07209	-0.93	0	-0.66	3.97831	reversibly glycosylated polypeptide 2
BnaC09g42220D	AT5G15650.1	-0.35	-2.07209	-0.49	0	-0.54	3.97831	reversibly glycosylated polypeptide 2
BnaA10g14200D	AT5G22140.1	0	1.60767	0	4.10093	0	2.3843	FAD/NAD
BnaA03g29270D	AT5G26360.1	-0.05	1.21608	0.03	-3.00331	-0.61	-1.03876	TCP-1/cpn60 chaperonin family protein
BnaA09g04250D	AT5G26360.1	0	1.21608	0	-3.00331	0	-1.03876	TCP-1/cpn60 chaperonin family protein
BnaAnng03000D	AT5G26360.1	0.33	1.21608	0.01	-3.00331	0.2	-1.03876	TCP-1/cpn60 chaperonin family protein
BnaC03g34470D	AT5G26360.1	0.1	1.21608	-0.11	-3.00331	-0.49	-1.03876	TCP-1/cpn60 chaperonin family protein
BnaA04g09420D	AT5G39570.1	0.14	-0.529109	0.04	1.71791	0.23	-6.63693	unknown protein
BnaC04g31650D	AT5G39570.1	0.34	-0.529109	0.12	1.71791	-0.16	-6.63693	unknown protein
BnaC09g16390D	AT5G39570.1	0.78	-0.529109	0.67	1.71791	0.2	-6.63693	unknown protein
BnaA03g17100D	AT5G42020.1	-1.11	-1.44076	-1.06	2.16444	-1.51	0.218888	BIP2
BnaA03g14210D	AT5G42020.1	-0.98	-1.44076	-1.32	2.16444	-2.07	0.218888	BIP2
BnaA07g05610D	AT5G42020.1	-1.74	-1.44076	-1.31	2.16444	-1.35	0.218888	BIP2
BnaA07g15650D	AT5G42020.1	0.15	-1.44076	-0.82	2.16444	3.68	0.218888	BIP2
BnaC03g17190D	AT5G42020.1	-1.03	-1.44076	-1.23	2.16444	-1.98	0.218888	BIP2
BnaC03g20620D	AT5G42020.1	-0.87	-1.44076	-1.05	2.16444	-1.35	0.218888	BIP2
BnaC06g13860D	AT5G42020.1	-0.72	-1.44076	-0.69	2.16444	0.96	0.218888	BIP2
BnaC07g48050D	AT5G42020.1	-1.26	-1.44076	-1.04	2.16444	-0.54	0.218888	BIP2
BnaA02g23400D	AT5G43060.1	0	12.3066	0	9.28773	0	4.86257	Granulin repeat cysteine protease family protein
BnaA06g36920D	AT5G43060.1	-0.04	12.3066	0.18	9.28773	3.69	4.86257	Granulin repeat cysteine protease family protein
BnaC02g30040D	AT5G43060.1	5.66	12.3066	6.38	9.28773	6.77	4.86257	Granulin repeat cysteine protease family protein
BnaC04g17750D	AT5G43060.1	0.16	12.3066	0.17	9.28773	3.41	4.86257	Granulin repeat cysteine protease family protein
BnaA02g24400D	AT5G46290.1	-0.09	1.40067	-0.06	-0.912691	-0.05	-1.0308	3-ketoacyl-acyl carrier protein synthase I
BnaA06g36060D	AT5G46290.1	0.59	1.40067	-0.05	-0.912691	-0.12	-1.0308	3-ketoacyl-acyl carrier protein synthase I
BnaA09g17930D	AT5G46290.1	0	1.40067	-0.26	-0.912691	-0.88	-1.0308	3-ketoacyl-acyl carrier protein synthase I
BnaC01g32050D	AT5G46290.3	2.78	1.40067	0	-0.912691	0	-1.0308	3-ketoacyl-acyl carrier protein synthase I
BnaC02g32230D	AT5G46290.1	-0.32	1.40067	-0.51	-0.912691	-0.38	-1.0308	3-ketoacyl-acyl carrier protein synthase I
BnaC06g25940D	AT5G46290.3	0.33	1.40067	-0.45	-0.912691	0.71	-1.0308	3-ketoacyl-acyl carrier protein synthase I
BnaC07g19000D	AT5G46290.1	0.01	1.40067	-0.48	-0.912691	-0.57	-1.0308	3-ketoacyl-acyl carrier protein synthase I
BnaC08g10730D	AT5G46290.2	0	1.40067	0.57	-0.912691	0	-1.0308	3-ketoacyl-acyl carrier protein synthase I
BnaC09g19280D	AT5G46290.1	-0.23	1.40067	-0.16	-0.912691	-0.02	-1.0308	3-ketoacyl-acyl carrier protein synthase I
BnaCnng67800D	AT5G46290.3	0	1.40067	0	-0.912691	0	-1.0308	3-ketoacyl-acyl carrier protein synthase I
BnaA01g18180D	AT5G48930.1	1.85	-2.31491	1.47	0.974805	1.04	-0.228122	hydroxycinnamoyl-CoA shikimate/quinate hydroxycinnamoyl transferase
BnaA07g00390D	AT5G48930.1	0.11	-2.31491	0.46	0.974805	-0.01	-0.228122	hydroxycinnamoyl-CoA shikimate/quinate hydroxycinnamoyl transferase
BnaC01g22120D	AT5G48930.1	2.1	-2.31491	0.65	0.974805	0.19	-0.228122	hydroxycinnamoyl-CoA shikimate/quinate hydroxycinnamoyl transferase
BnaC07g00330D	AT5G48930.1	0.09	-2.31491	0.59	0.974805	-0.18	-0.228122	hydroxycinnamoyl-CoA shikimate/quinate hydroxycinnamoyl transferase
BnaA03g46660D	AT5G49910.1	0.11	0	0.3	-7.23767	0.78	0.0347373	chloroplast heat shock protein 70-2
BnaC08g11470D	AT5G49910.1	0	0	0	-7.23767	0	0.0347373	chloroplast heat shock protein 70-2
BnaA02g09190D	AT5G55190.1	0.13	-0.689912	0.08	0.677639	1.46	-0.00145537	RAN GTPase 3
BnaA10g09430D	AT5G55190.1	-0.35	-0.689912	-0.2	0.677639	0.82	-0.00145537	RAN GTPase 3
BnaC02g13240D	AT5G55190.1	-0.32	-0.689912	-0.06	0.677639	0.81	-0.00145537	RAN GTPase 3
BnaC09g31730D	AT5G55190.1	-0.23	-0.689912	-0.18	0.677639	1.04	-0.00145537	RAN GTPase 3
BnaA02g35440D	AT5G56000.1	-1.4	-0.0641759	0.69	-4.31034	-0.18	-1.69726	HEAT SHOCK PROTEIN 81.4
BnaA03g10790D	AT5G56000.1	-0.4	-0.0641759	-0.12	-4.31034	1.03	-1.69726	HEAT SHOCK PROTEIN 81.4
BnaC02g12680D	AT5G56000.1	0	-0.0641759	0	-4.31034	0	-1.69726	HEAT SHOCK PROTEIN 81.4
BnaC02g12700D	AT5G56000.1	1.13	-0.0641759	1.43	-4.31034	4.78	-1.69726	HEAT SHOCK PROTEIN 81.4
BnaC02g12750D	AT5G56000.1	-1.56	-0.0641759	-0.05	-4.31034	1.17	-1.69726	HEAT SHOCK PROTEIN 81.4
BnaA02g06390D	AT5G60360.1	0.75	10.7446	0.72	12.1305	1.14	11.5958	aleurain-like protease
BnaA02g06420D	AT5G60360.1	-0.01	10.7446	-0.39	12.1305	1.25	11.5958	aleurain-like protease
BnaA03g08940D	AT5G60360.2	0.6	10.7446	0.01	12.1305	0.95	11.5958	aleurain-like protease
BnaA03g08960D	AT5G60360.1	0	10.7446	0	12.1305	0	11.5958	aleurain-like protease
BnaA09g04370D	AT5G60360.1	0	10.7446	0	12.1305	0	11.5958	aleurain-like protease
BnaA10g13210D	AT5G60360.1	-0.33	10.7446	0.17	12.1305	2.97	11.5958	aleurain-like protease
BnaC03g11190D	AT5G60360.1	0.9	10.7446	0	12.1305	0	11.5958	aleurain-like protease
BnaC03g11290D	AT5G60360.3	-4.5	10.7446	0.26	12.1305	0	11.5958	aleurain-like protease
BnaC09g35690D	AT5G60360.1	-0.11	10.7446	0.28	12.1305	2.88	11.5958	aleurain-like protease
BnaA02g06190D	AT5G60640.1	0.56	-8.103	-1.01	-9.40519	-0.88	0	PDI-like 1-4
BnaA10g13460D	AT5G60640.1	0.26	-8.103	0.04	-9.40519	0.26	0	PDI-like 1-4
BnaC09g53940D	AT5G60640.1	0.14	-8.103	-0.13	-9.40519	-0.05	0	PDI-like 1-4
BnaA02g34760D	AT5G66570.1	-0.12	-0.544531	0.15	-1.45254	0.98	2.76997	PS II oxygen-evolving complex 1
BnaA03g53620D	AT5G66570.1	0	-0.544531	0	-1.45254	0	2.76997	PS II oxygen-evolving complex 1
BnaA07g12480D	AT5G66570.1	-0.59	-0.544531	0.35	-1.45254	0.97	2.76997	PS II oxygen-evolving complex 1
BnaA09g07840D	AT5G66570.1	-0.53	-0.544531	0.4	-1.45254	1.38	2.76997	PS II oxygen-evolving complex 1
BnaC02g48890D	AT5G66570.1	-0.64	-0.544531	0	-1.45254	1.36	2.76997	PS II oxygen-evolving complex 1
BnaC07g16640D	AT5G66570.1	-0.67	-0.544531	0.24	-1.45254	1.4	2.76997	PS II oxygen-evolving complex 1
