# Supplementary material for: The initial deficiency of protein processing and flavonoids biosynthesis were the main mechanisms for the male sterility induced by SX-1 in Brassica napus
Source: BMC Genomics. 2018 Nov 7;19:806. doi: 10.1186/s12864-018-5203-y (PMC6223035; doi:10.1186/s12864-018-5203-y)
Supplement: Supplementary file 14 — The candidate genes used for interaction analysis. (XLSX 16 kb) [file 12864_2018_5203_MOESM14_ESM.xlsx]

## Sheet: sheet1
Additional file 14. The candidate genes used for interaction analysis.
Gene name	Gene symbol	Gene catalogue
At4G21330	DYT1	anther development-related
AT4G18960	AG	anther development-related
AT1G02065	SPL8	anther development-related
At5G07280	EMS1	anther development-related
At4G24972	TPD1	anther development-related
AT1G71830	SERK1	anther development-related
AT1G34210	SERK2	anther development-related
At5G06100	MYB33	anther development-related
At3G11440	MYB65	anther development-related
At5G22260	MS1	anther development-related
At2G16910	AMS	anther development-related
At4G20900	MS5	anther development-related
AT3G45640	MPK3	anther development-related
AT5G07180	ERL2	anther development-related
At3G42960	ATA1	anther development-related
AT2G17950	WUS	anther development-related
AT5G56110	MYB80	anther development-related
AT5G62320	MYB99	anther development-related
AT2G38470	WRKY33	anther development-related
AT4G01250	WRKY22	anther development-related
AT2G46400	WRKY46	anther development-related
AT1G61110	NAC025	anther development-related
AT5G65700	MPA24.5	anther development-related
AT3G49670	AT3G49670	anther development-related
AT4G27330	SPL	anther development-related
AT2G39350	ABCG1	anther development-related
AT4G27420	ABCG9	anther development-related
AT3G13220	ABCG26	anther development-related
AT3G55090	ABCG16	anther development-related
AT2G29940	ABCG31	anther development-related
AT1G01280	CYP703A2	anther development-related
AT1G62940	ACOS5	anther development-related
AT3G51590	LTP12	anther development-related
AT4G14080	MEE48	anther development-related
AT2G40890	CYP98A3	flavonoid biosynthesis
AT5G13930	TT4	flavonoid biosynthesis
AT1G67980	CCOAMT	flavonoid biosynthesis
AT3G51240	F3H	flavonoid biosynthesis
AT2G30490	C4H	flavonoid biosynthesis
AT4G34050	CCoAOMT1	flavonoid biosynthesis
AT1G24735	AT1G24735	flavonoid biosynthesis
AT5G07990	TT7	flavonoid biosynthesis
AT3G47040	AT3G47040	Phenylpropanoid biosynthesis
AT2G44450	BGLU15	Phenylpropanoid biosynthesis
AT4G33870	AT4G33870	Phenylpropanoid biosynthesis
AT3G60140	DIN2	Phenylpropanoid biosynthesis
AT1G05260	RCI3	Phenylpropanoid biosynthesis
AT4G36430	AT4G36430	Phenylpropanoid biosynthesis
AT4G16270	AT4G16270	Phenylpropanoid biosynthesis
AT4G25980	AT4G25980	Phenylpropanoid biosynthesis
AT5G04885	AT5G04885	Phenylpropanoid biosynthesis
AT2G24800	AT2G24800	Phenylpropanoid biosynthesis
AT1G44970	AT1G44970	Phenylpropanoid biosynthesis
AT4G05160	AT4G05160	Phenylpropanoid biosynthesis
AT4G34230	CAD5	Phenylpropanoid biosynthesis
AT4G36220	CYP84A1	Phenylpropanoid biosynthesis
AT5G44640	BGLU13	Phenylpropanoid biosynthesis
AT3G21230	4CL5	Phenylpropanoid biosynthesis
AT4G27830	BGLU10	Phenylpropanoid biosynthesis
AT4G19010	AT4G19010	Phenylpropanoid biosynthesis
AT2G25630	BGLU14	Phenylpropanoid biosynthesis
AT1G80820	AT1G80820	Phenylpropanoid biosynthesis
AT1G78050	AT1G78050	Biosynthesis of amino acids
AT2G44530	AT2G44530	Biosynthesis of amino acids
AT2G44530	AT2G44530	Biosynthesis of amino acids
AT3G49160	AT3G49160	Biosynthesis of amino acids
AT5G63680	AT5G63680	Biosynthesis of amino acids
AT1G10070	BCAT-2	Biosynthesis of amino acids
AT1G48850	EMB1144	Biosynthesis of amino acids
AT3G04120	GAPC1	Biosynthesis of amino acids
AT1G13440	GAPC2	Biosynthesis of amino acids
AT3G17820	GLN1.3	Biosynthesis of amino acids
AT5G16570	GLN1.4	Biosynthesis of amino acids
AT5G53460	GLT1	Biosynthesis of amino acids
At3g48560	CSR1	Biosynthesis of amino acids
AT3G03780	AT3G03780	Biosynthesis of amino acids
AT2G36530	LOS2	Biosynthesis of amino acids
AT2G36880	MAT3	Biosynthesis of amino acids
AT3G17390	MTO3	Biosynthesis of amino acids
AT4G37670	NAGS2	Biosynthesis of amino acids
AT2G22480	PFK5	Biosynthesis of amino acids
AT1G32380	PRS2	Biosynthesis of amino acids
AT1G02500	SAM1	Biosynthesis of amino acids
AT2G21940	SK1	Biosynthesis of amino acids
AT5G15530	BCCP2	fatty acid biosynthesis
AT1G24360	AT1G24360	fatty acid biosynthesis
AT3G02630	AT3G02630	fatty acid biosynthesis
AT5G46290	KASI	fatty acid biosynthesis
AT1G62640	T3P18.20	fatty acid biosynthesis
AT5G16390	CAC1	fatty acid biosynthesis
AT2G04350	LACS8	fatty acid biosynthesis
AT2G30200	EMB3147	fatty acid biosynthesis
AT4G11030	AT4G11030	fatty acid biosynthesis
AT3G05970	LACS6	fatty acid biosynthesis
AT2G38040	CAC3	fatty acid biosynthesis
AT1G64400	LACS3	fatty acid biosynthesis
AT2G43710	SSI2	fatty acid biosynthesis
AT3G25110	FaTA	fatty acid biosynthesis
AT1G36160	ACC1	fatty acid biosynthesis
AT2G28630	KCS12	fatty acid biosynthesis
AT1G07720	KCS3	fatty acid biosynthesis
AT1G04220	KCS2	fatty acid biosynthesis
AT4G22756	SMO1-2	Steroid biosynthesis
AT2G07050	CAS1	Steroid biosynthesis
AT1G07420	SMO2-1	Steroid biosynthesis
AT2G29390	SMO2-2	Steroid biosynthesis
AT5G04040	SDP1	Steroid biosynthesis
AT1G11680	CYP51G1	Steroid biosynthesis
AT3G57140	SDP1-LIKE	Steroid biosynthesis
AT4G22753	SMO1-3	Steroid biosynthesis
AT1G20050	HYD1	Steroid biosynthesis
AT3G02580	STE1	Steroid biosynthesis
AT2G26260	RTNLB19	Steroid biosynthesis
AT1G47290	RTNLB24	Steroid biosynthesis
AT5G13710	SMT1	Steroid biosynthesis
AT4G34640	SQS1	Steroid biosynthesis
AT2G23170	GH3.3	Plant hormone signal transduction
AT2G14960	GH3.1	Plant hormone signal transduction
AT3G23030	IAA2	Plant hormone signal transduction
AT4G00710	BSK3	Plant hormone signal transduction
AT1G23160	AT1G23160	Plant hormone signal transduction
AT1G59940	ARR3	Plant hormone signal transduction
AT2G46370	JAR1	Plant hormone signal transduction
AT1G68640	PAN	Plant hormone signal transduction
AT2G40330	PYL6	Plant hormone signal transduction
AT5G18030	AT5G18030	Plant hormone signal transduction
AT4G39400	BRI1	Plant hormone signal transduction
AT1G09530	PIF3	Plant hormone signal transduction
AT4G34750	AT4G34750	Plant hormone signal transduction
AT4G27260	WES1	Plant hormone signal transduction
AT5G65670	IAA9	Plant hormone signal transduction
AT3G62670	RR20	Plant hormone signal transduction
AT4G28640	IAA11	Plant hormone signal transduction
AT3G15540	IAA19	Plant hormone signal transduction
AT4G37390	BRU6	Plant hormone signal transduction
AT1G67710	ARR11	Plant hormone signal transduction
AT2G33310	IAA13	Plant hormone signal transduction
AT3G29350	ATHP1	Plant hormone signal transduction
AT1G74890	ARR15	Plant hormone signal transduction
AT4G34210	SK11	Protein processing in endoplasmic reticulum
AT4G02570	CUL1	Protein processing in endoplasmic reticulum
AT5G56150	UBC30	Protein processing in endoplasmic reticulum
AT3G12580	HSP70	Protein processing in endoplasmic reticulum
AT5G38470	RAD23D	Protein processing in endoplasmic reticulum
AT2G29500	AT2G29500	Protein processing in endoplasmic reticulum
AT2G32920	PDIL2-3	Protein processing in endoplasmic reticulum
AT5G56000	Hsp81.4	Protein processing in endoplasmic reticulum
AT4G24190	SHD	Protein processing in endoplasmic reticulum
AT4G27670	HSP21	Protein processing in endoplasmic reticulum
AT1G56340	CRT1a	Protein processing in endoplasmic reticulum
AT1G24320	AT1G24320	Protein processing in endoplasmic reticulum
AT2G25700	SK3	Protein processing in endoplasmic reticulum
AT5G20970	AT5G20970	Protein processing in endoplasmic reticulum
AT5G12020	HSP17.6II	Protein processing in endoplasmic reticulum
AT1G29310	AT1G29310	Protein processing in endoplasmic reticulum
AT4G10250	ATHSP22.0	Protein processing in endoplasmic reticulum
AT4G34470	SK12	Protein processing in endoplasmic reticulum
AT1G79650	RAD23B	Protein processing in endoplasmic reticulum
AT1G20140	SK4	Protein processing in endoplasmic reticulum
AT2G17200	DSK2	Protein processing in endoplasmic reticulum
AT5G38470	RAD23D	Protein processing in endoplasmic reticulum
AT3G54130	AT3G54130	Protein processing in endoplasmic reticulum
AT4G32670	AT4G32670	Protein processing in endoplasmic reticulum
AT3G21160	MNS2	Protein processing in endoplasmic reticulum
AT5G42020	BIP2	Protein processing in endoplasmic reticulum
AT1G04980	PDIL2-2	Protein processing in endoplasmic reticulum
AT1G52560	AT1G52560	Protein processing in endoplasmic reticulum
AT5G61790	CNX1	Protein processing in endoplasmic reticulum
AT3G60010	SK13	Protein processing in endoplasmic reticulum
AT2G34250	AT2G34250	Protein processing in endoplasmic reticulum
AT2G40290	AT2G40290	Protein processing in endoplasmic reticulum
AT3G53230	AtCDC48B	Protein processing in endoplasmic reticulum
AT5G02500	HSC70-1	Protein processing in endoplasmic reticulum
AT5G51440	AT5G51440	Protein processing in endoplasmic reticulum
AT4G25230	RIN2	Protein processing in endoplasmic reticulum
AT1G06870	Plsp2A	Protein export
AT1G29310	AT1G29310	Protein export
AT1G48160	AT1G48160	Protein export
AT1G48900	AT1G48900	Protein export
AT1G52600	AT1G52600	Protein export
AT1G53530	AT1G53530	Protein export
AT1G67680	AT1G67680	Protein export
AT2G22425	AT2G22425	Protein export
AT2G34250	AT2G34250	Protein export
AT2G39960	AT2G39960	Protein export
AT2G43640	AT2G43640	Protein export
AT3G08980	AT3G08980	Protein export
AT3G15710	AT3G15710	Protein export
AT3G20920	AT3G20920	Protein export
AT3G49100	AT3G49100	Protein export
AT3G60540	AT3G60540	Protein export
AT4G21180	ATERDJ2B	Protein export
AT5G27430	AT5G27430	Protein export
AT5G42020	BIP2	Protein export
AT5G50460	AT4G24920	Protein export
AT5G60460	AT5G60460	Protein export
AT5G61970	AT5G61970	Protein export
AT4G01970	STS	Galactose metabolism
AT1G12780	UGE1	Galactose metabolism
AT5G15140	AT5G15140	Galactose metabolism
AT5G20250	DIN10	Galactose metabolism
AT3G57520	SIP2	Galactose metabolism
AT3G13790	ATBFRUCT1	Galactose metabolism
AT1G62660	AT1G62660	Galactose metabolism
AT5G08370	AGAL2	Galactose metabolism
